# Supplementary material for: Reduced keratin expression in colorectal neoplasia and associated fields is reversible by diet and resection
Source: PubMed Central journal article supplement (PMC4599164; doi:10.1136/bmjgast-2014-000022), 2015-04-17
Supplement: bmjgast-2014-000022supp.pdf [file bmjgast-2014-000022supp.pdf]

## **Online Data Supplement**

**for:**

# **Reduced keratin expression in colorectal neoplasia and associated fields is reversible by both diet and resection**

Caroline A Evans, Ria Rosser, Jennifer S Waby, Josselin Noirel, Daphne Lai,  
Phillip C Wright, Elizabeth A Williams, Stuart A Riley, Jonathan P Bury &  
Bernard M Corfe

**Author to whom correspondence should be addressed:** Dr Bernard Corfe, Molecular  
Gastroenterology Research Group, Academic Unit of Surgical Oncology, Department of Oncology, The  
Medical School, Beech Hill Road, Sheffield, S10 2RX,

email: [b.m.corfe@shef.ac.uk](mailto:b.m.corfe@shef.ac.uk) ,

Tel: +44 (0) 114 271 3004

### Supplementary information 1: Biopsy strategy

The table below summarises the biopsies taken from subjects according to intra-endoscopic diagnosis, and the subsequent application of this material. The strategy is also summarised in detail in our study design paper<sup>1</sup>

| Diagnosis | Biopsy Position(s)    | Other Samples                      |
|-----------|-----------------------|------------------------------------|
| Normal    | 2x mid-sigmoid        | Stool (for SCFA)<br>Biopsy for IHC |
| Adenoma   | 2x mid-sigmoid        | Stool (for SCFA) Biopsy<br>for IHC |
|           | 2x contralateral wall | Biopsy for IHC                     |
|           | 2x adenoma            | Biopsy for IHC                     |

---

<sup>1</sup> Corfe, B. M., Williams, E. A., Bury, J. P., Riley, S. A., Croucher, L. J., Lai, D. Y., . . . Evans, C. A. (2009). A study protocol to investigate the relationship between dietary fibre intake and fermentation, colon cell turnover, global protein acetylation and early carcinogenesis: the FACT study.. *BMC Cancer*, 9, 332.

## **Supplementary information 2: Detailed iTRAQ workflow.**

### *Lysis, pooling and fractionation*

Colorectal pinch biopsies (~5mg) were suspended in 30µl of kinase buffer/mg in a Bertin CK14 homogenisation tube followed by homogenisation. The lysate was removed and centrifuged to separate the insoluble fraction and the supernatant (insoluble fraction). Biopsies were grouped by diagnosis and region and were ranked by faecal butyrate level and then pooled: eight biopsy lysates (two each from four patients) we used in each pool. Acetyl proteins were immunoprecipitated using antibody Ab 3879 (Chemicon Anti-acetyl lysine, rabbit polyclonal) antibody immobilised to a Pierce Seize column following manufacturer's directions. Samples were diluted in binding buffer, mixed over the antibody-gel slurry overnight and then unbound fraction was eluted by gravity flow. Bound fractions enriched for acetyl proteins were analysed by 2D Gel Electrophoresis (see below), the unbound soluble proteins were analysed by an iTRAQ workflow (see below). The insoluble fraction is principally intermediate filaments, and was extracted and solubilised by our adapted method[25] before analysis by iTRAQ. The workflow is summarised in Figure 1.

### *Peptide labeling with iTRAQ Reagents*

Samples (100 µg each) were proteolytically digested with trypsin, reduced and cysteine blocked, then labeled according to procedures outlined by Applied Biosystems.

### *Peptide fractionation*

Strong cation exchange was achieved using a PolySULFOETHYL A Pre-Packed Column (PolyLC, Columbia, MD) with a 5 µm particle size and a column dimension of 100 mm×4.6 mm i.d., 200 Å pore size, on a BioLC HPLC (Dionex, Surrey, U.K.). SCX was achieved using a low ionic buffer A (20% acetonitrile, 0.1% formic acid), a high ionic buffer B (20% acetonitrile, 0.1% formic acid, 500 mM KCl). Sample was loaded onto the column and washed for at least 60 minutes at a flow rate of 0.4 mL/min with 100 % SCX Buffer A (20 % acetonitrile, 0.1 % Formic Acid) to remove salts, TCEP and unincorporated iTRAQ reagent. Peptides were then separated using a gradient of SCX Buffer B (20% acetonitrile, 0.1% formic acid, 0.5 M KCl) at the same flow rate of 400 µL /min. Buffer B levels increased from 0% to 25% from 5 minutes to 30 minutes then from 25% to 100% over 5 minutes, followed by an increase from 26% to 100% over the next 15 min. Buffer B was held for another 5 min for isocratic washing prior to column re-equilibration with buffer A. The sample injection volume was 100 µL, and the liquid flow rate was 0.4 mL/min. The SCX chromatogram was monitored using UVD170U ultraviolet detector and Chromeleon software v. 6.50 (Dionex, LC Packings, The Netherlands). Fractions were collected using a Foxy Jr. (Dionex) fraction collector in 1 min intervals. Fractions were vacuum-concentration prior to LC-MS/MS analysis.

### *LC-MS/MS analysis*

Fractions collected from offline separation techniques were eluted through the Famos-Ultimate 3000 nano-LC system (Dionex, LC Packings, The Netherlands) interfaced with a QSTAR XL (Applied Biosystems; MDS-Sciex) tandem ESI-QUAD-TOF MS. Vacuum dried fractions were resuspended in loading buffer (3% acetonitrile, 0.1% trifluoroacetic acid), injected and captured into a 0.3×5 mm trap column (3 µm C18 Dionex-LC Packings). Trapped samples were then eluted onto a 0.075×150 mm analytical column (3 µm C18 Dionex-LC Packings) using an automated binary gradient with a flow of 300 nL/min from 95% buffer A (3% acetonitrile, 0.1% formic acid), to 35% buffer B (97% acetonitrile, 0.1% formic acid) over 90 min, followed by a 5 min ramp to 95% buffer II (with isocratic washing for 10 min). Predefined 1 s 350–1600 m/z MS survey scans were acquired with up to two dynamically excluded precursors selected for a 3 s MS/MS (m/z 65–2000) scan. The collision energy range was increased by 20% as compared to the unlabeled peptides in order to overcome the stabilizing effect of the basic N-terminal derivatives, and to achieve equivalent fragmentation as recommended by Applied Biosystems.

### *Protein identification and relative quantification*

The mass-spectrometric data was collected and analysed as previously described<sup>2, 3</sup>. Briefly, MS/MS data generated from the QSTAR<sup>®</sup> XL was first converted to generic MGF peaklists using the mascot.dll embedded script (version 1.6 release no. 25) in Analyst QS v. 1.1 (Applied Biosystems, Sciex; Matrix Science). Further processing of the data was undertaken using an in-house Phenyx algorithm cluster (binary version 2.6; Geneva Bioinformatics SA) at the ChELSI Institute, University of Sheffield, against the *Homo sapiens* UniProt protein knowledgebase (SwissProt and TrEMBL (41070 and 71449 entries respectively, downloaded 5th November 2010,) to derive peptide sequence and hence protein identification. These data were then searched within the reversed *Homo sapiens* database to estimate the false-positive rate<sup>4</sup>. Peptides identifications at 1% false discovery rate were accepted. The iTRAQ reporter ion intensities were exported. Protein quantifications were obtained by computing the geometric means of the reporters' intensities. Median correction was subsequently applied to every reporter in order to compensate for systematic errors, e.g. if a sample happened to

---

<sup>2</sup> Pham, T.K., et al., A quantitative proteomic analysis of biofilm adaptation by the periodontal pathogen *Tannerella forsythia*. *Proteomics*, 2010. 10(17): p. 3130-41.

<sup>3</sup> Majumdar, D., Rosser, R., Havard, S., Lobo, A. J., Wright, P. C., Evans, C. A., Corfe, B. M. (2012, July). An integrated workflow for extraction and solubilization of intermediate filaments from colorectal biopsies for proteomic analysis.. *Electrophoresis*, 33(13), 1967-1974.

<sup>4</sup> Elias, J.E. and S.P. Gygi, Target-decoy search strategy for increased confidence in large-scale protein identifications by mass spectrometry. *Nat Methods*, 2007. 4(3): p. 207-14.

have been loaded at a largely different total concentration. The reporters' intensities, in each individual MS/MS scan, were also median corrected using the same factors, with the rationale that if the total concentration of a sample A was half that of another sample B, the intensities of sample A's reporter have to be doubled to allow for a fair comparison. *t*-tests applied to determine alterations in protein level between samples use these corrected intensities since these were carried out for every protein and because of the multiple times each test was performed, the threshold ( $\alpha=5\%$ ) used for significance was corrected for data mining. Here, we used the standard Bonferroni correction ( $\alpha/P$ , where *P* is the number of proteins) to minimise false positive results. This workflow was developed in house<sup>2</sup>.

#### *Calculation of pI and MW*

The physicochemical properties of peptides identified and relatively quantified in the analysis were plotted using the Innovagen peptide property calculator.

### **Supplementary information 3: Detailed 2d gel method**

Protein lysates were prepared from frozen patient mononuclear cell material, which was resuspended in 350  $\mu$ l of isoelectric focusing buffer (9 m urea, 2 m thiourea, 4% (w/v) CHAPS, 65 mm dithiothreitol, 0.5% (v/v) IPG buffer (Amersham Biosciences)) per  $1 \times 10^6$  cells. Isoelectric focusing was performed using 18-cm immobilized pH gradient strips (pH 3-10 NL) and the Multiphor II instrument (Amersham Biosciences), focusing for a total of 49 kV h at 20 °C. The second dimension was a standard SDS-PAGE protocol using the ISODALT system (Amersham Biosciences). Strips were equilibrated for 10 min in equilibration buffer (50 mm Tris-HCl, pH 6.8, 6 m urea, 30% (v/v) glycerol, 2% (v/v) SDS) containing 65 mm dithiothreitol and then for 10 min in the same buffer containing 240 mm iodoacetamide. Second-dimension gels were 12% SDS-PAGE gels of  $160 \times 180 \times 0.75$  mm. Gels were stained with silver using the protocol of Shevchenko et al<sup>5</sup>.

---

<sup>5</sup> Shevchenko, A., Wilm, M., Vorm, O., and Mann, M. (1996) Mass spectrometric sequencing of proteins silver-stained polyacrylamide gels. *Anal. Chem.* 68, 850–858

#### Supplementary information 4: Summary of Patient data

| <b>Subject Characteristics</b> |                    |                  |                             |               |
|--------------------------------|--------------------|------------------|-----------------------------|---------------|
|                                | <b>Normal</b>      | <b>Adenoma</b>   | <i>p</i>                    |               |
| <b>n</b>                       | <b>34</b>          | <b>28</b>        |                             |               |
| <b>Age (yr)</b>                | <b>62.5±11.4</b>   | <b>68.1±10.1</b> | <b>0.047</b>                |               |
| <b>Weight (Kg)</b>             | <b>82.6± XX</b>    | <b>78.2±11.6</b> | <b>0.247</b>                |               |
| <b>BMI (Kg/m2)</b>             | <b>26.4±4.8</b>    | <b>25.5 ±3.4</b> | <b>0.404</b>                |               |
| <b>Adenoma Characteristics</b> |                    |                  |                             |               |
| <b>&lt;10mm /≥10mm</b>         | <b>13/14</b>       |                  |                             |               |
| <b>Synchronous adenoma</b>     | <b>3</b>           |                  |                             |               |
| <b>Caecal</b>                  | <b>Right sided</b> | <b>Sigmoid</b>   | <b>Recosigmoid junction</b> | <b>Rectal</b> |
| <b>3</b>                       | <b>3</b>           | <b>5</b>         | <b>2</b>                    | <b>2</b>      |

**Supplementary Information 5: Table of proteins identified in the IF Dataset**

| <b>Ascension number</b> | <b>Number of peptides matched</b> | <b>Protein name</b>                                                                 |
|-------------------------|-----------------------------------|-------------------------------------------------------------------------------------|
| A2NUT2_CHAIN_0          | 1                                 | Lambda chain                                                                        |
| A4D1Z4                  | 1                                 | KIA00415 gene product                                                               |
| A6NN01                  | 1                                 | histone A2A                                                                         |
| B0YJC4                  | 1                                 | vimentin                                                                            |
| B3KSN3                  | 1                                 | C DNA (highly similar to ATP-binding cassette sub-family B member 8, mitochondrial) |
| B4DGF3                  | 1                                 | C DNA (highly similar to Talin-2)                                                   |
| B4DIK9                  | 1                                 | C DNA                                                                               |
| B4DRV1                  | 1                                 | C DNA (highly similar to Protein-glutamine gamma-glutamyltransferase K)             |
| B4DRX3                  | 1                                 | 60S ribosomal protein                                                               |
| B4DU60                  | 1                                 | Citrate lyase subunit beta-like protein, mitochondrial                              |
| B4DUI9                  | 1                                 | C DNA (highly similar to Troponin C, skeletal muscle)                               |
| B5MEB8                  | 1                                 | obsolete                                                                            |
| B7Z1I0                  | 1                                 | integrin linked protein kinase                                                      |
| B7Z2X4                  | 1                                 | C DNA (highly similar to Gelsolin)                                                  |
| B8ZZ37                  | 1                                 | obsolete                                                                            |
| D2CFK5                  | 1                                 | somatostatin receptor 5C                                                            |
| D3YTB1                  | 1                                 | 60S ribosomal protein                                                               |
| P05141_CHAIN_0          | 1                                 | ADP/ATP translocase 2                                                               |
| P06733_CHAIN_0          | 1                                 | Alphaenolase                                                                        |
| P26599                  | 1                                 | Polypyrimidine tract binding protein                                                |
| P35268_CHAIN_0          | 1                                 | 60S ribosomal protein                                                               |



|                   |   |                                                          |
|-------------------|---|----------------------------------------------------------|
| P50914_CHAIN_0    | 1 | 60S ribosomal protein                                    |
| P51884_CHAIN_0    | 1 | Lumican                                                  |
| P62269_CHAIN_0    | 1 | 40s ribosomal protein                                    |
| P98160_CHAIN_0    | 1 | basement membrane                                        |
| Q15746_ISOFORM_3B | 1 | myosin light chain                                       |
| Q3B7J3            | 1 | ZCCHC3 protein                                           |
| Q53S60            | 1 | putatative uncharacterised protein                       |
| Q6IBG5            | 1 | MYL6 protein                                             |
| Q6NUK4_ISOFORM_2  | 1 | Receptor expression-enhancing protein 3                  |
| Q71S07            | 1 | Non-erythrocytic beta-spectrin 4                         |
| Q765P7_ISOFORM_2  | 1 | Actin-bundling with BAIAP2 homology protein 1            |
| Q8N7L7            | 1 | C DNA (FLJ40893 fis, clone UTERU200160)                  |
| Q8WXQ3            | 1 | putatative uncharacterised protein                       |
| Q96S66_ISOFORM_4  | 1 | Chloride channel CLIC-like protein 1                     |
| Q9BYE0            | 1 | Transcription factor HES-7                               |
| Q9H0N0            | 1 | Ras-related protein Rab-6C                               |
| Q9H6H4_ISOFORM_2  | 1 | Receptor expression-enhancing protein 4                  |
| Q9NYP9            | 1 | RER1 Protein                                             |
| Q9UED0            | 1 | amyloid like protein 2                                   |
| A8K230            | 2 | zinc finger protein                                      |
| B4DJ98            | 2 | C DNA (highly similar to Protein disulfide-isomerase A3) |
| B4DJC3            | 2 | Histone H2A                                              |
| B4DPR2            | 2 | C DNA (highly similar to Serum albumin)                  |
| B4DRD6            | 2 | Histone H1                                               |
| B7Z3F2            | 2 | C DNA                                                    |

|                         |   |                                                 |
|-------------------------|---|-------------------------------------------------|
| B7Z3U6                  | 2 | sodium pump subunit alpha 1                     |
| C9JA88                  | 2 | obsolete                                        |
| C9JRX8                  | 2 | LYR motif containing protein 4                  |
| D3DP13                  | 2 | fibrinogen beta chain                           |
| P07355_CHAIN_0          | 2 | Annexin A2                                      |
| P07585_CHAIN_0          | 2 | Decorin                                         |
| P08727                  | 2 | K19                                             |
| P11021_CHAIN_0          | 2 | 78 kDA glucose related protein                  |
| P15924                  | 2 | Desmoplakin                                     |
| P54707                  | 2 | potassium transporting ATPase alpha 2           |
| Q01082_ISOFORM_2        | 2 | Spectrin beta chain                             |
| Q3MIV8                  | 2 | myosin heavy chain 11                           |
| Q59GW6                  | 2 | Acetyl-CoA acetyltransferase, cytosolic variant |
| Q6DD88                  | 2 | atlastin-3                                      |
| Q9P0H9                  | 2 | Ribosome binding protein1                       |
| Q9P2E9_ISOFORM_1        | 2 | Ribosome binding protein1                       |
| Q9Y4F5_ISOFORM_3        | 2 | Protein KIAA0284                                |
| Q9Y6C2_CHAIN_0          | 2 | Elastin microfibril interface-located protein 1 |
| A6NKY3                  | 3 | obsolete                                        |
| A8K092                  | 3 | ATP synthase subunit alpha                      |
| B2R4U6                  | 3 | C DNA                                           |
| P02545_ISOFORM_ADelta10 | 3 | Prelamin                                        |
| P08572                  | 3 | collagen alpha 2 chain                          |
| P16401_CHAIN_0          | 3 | Histone H1.5                                    |
| P46782_CHAIN_1          | 3 | 40s ribosomal protein                           |
| P62851                  | 3 | 40s ribosomal protein                           |
| B4E335                  | 4 | Actin                                           |

|                  |     |                                                                |
|------------------|-----|----------------------------------------------------------------|
| P62277_CHAIN_0   | 4   | 40s ribosomal protein                                          |
| Q12959_ISOFORM_5 | 4   | disks large homolg                                             |
| P01857           | 5   | Ig gamma chain region 1C                                       |
| P05783_CHAIN_0   | 5   | K18                                                            |
| P12111_ISOFORM_2 | 5   | collagen alpha 3 chain                                         |
| P35579_ISOFORM_2 | 5   | Myosin 9                                                       |
| B7Z9B0           | 7   | C DNA growth arrest specific protein 8                         |
| P02461_CHAIN_0   | 8   | collagen alpha 1 chain                                         |
| Q53SW3           | 8   | putatative uncharacterised protein                             |
| Q5HY54           | 8   | filamin A                                                      |
| P05787_CHAIN_0   | 10  | K8                                                             |
| Q702N8_ISOFORM_B | 10  | Xin actin-binding repeat-containing protein 1                  |
| Q9HAM5           | 10  | C DNA (moderately similar to HYPOXIA-INDUCIBLE FACTOR 1 ALPHA) |
| Q9NRC6           | 10  | Spectrin beta chain                                            |
| P12109_CHAIN_0   | 11  | collagen alpha 1 chain                                         |
| Q14222           | 12  | EEF1A                                                          |
| P58876_CHAIN_0   | 14  | Histone H2B                                                    |
| P68431_CHAIN_0   | 18  | histone H3.1                                                   |
| P50591           | 27  | TNF superfamily lignd 10                                       |
| P02452_CHAIN_0   | 37  | collagen alpha 1 chain                                         |
| P08123_CHAIN_0   | 60  | collagen alpha 2 chain                                         |
| P62805_CHAIN_0   | 119 | histone                                                        |

## Supplementary Information 6: Protein interaction network for the IF Dataset

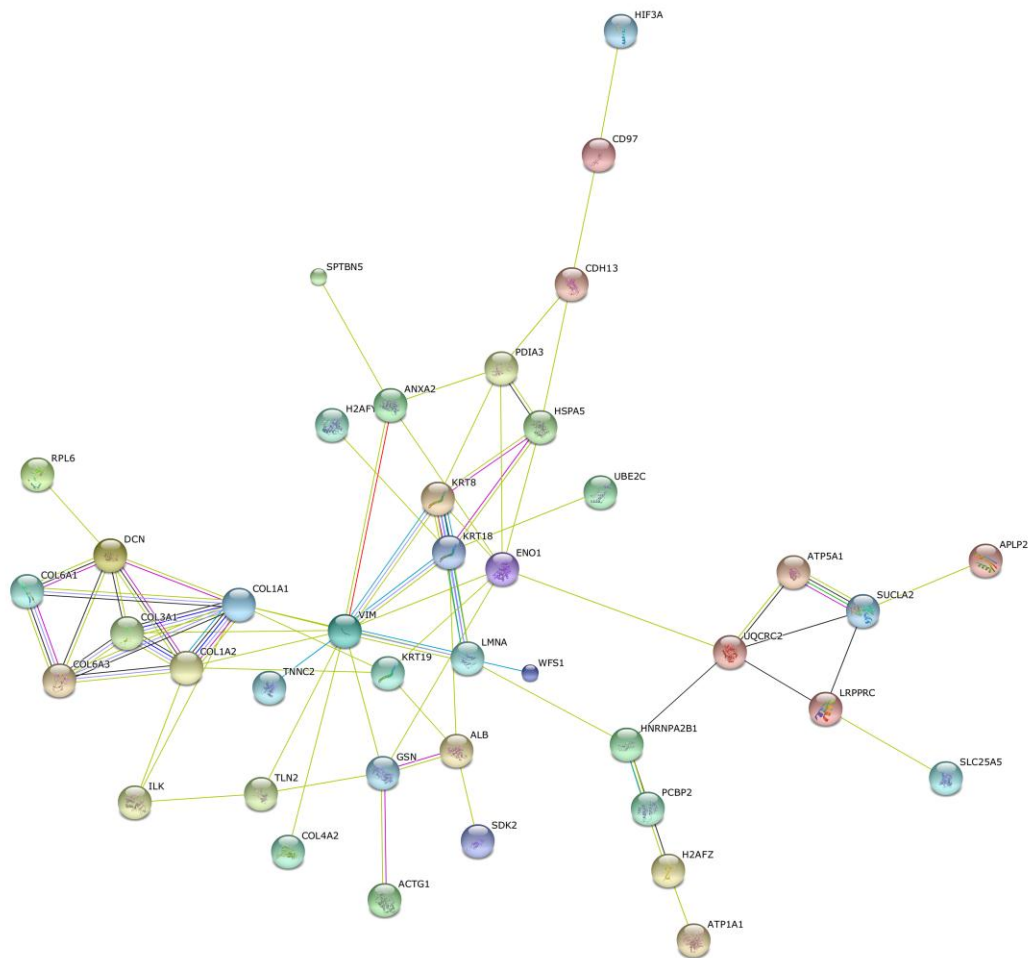

Protein identifiers for the IF fraction were submitted to STRINGS database. Orphan nodes were excluded from the representation. All remaining proteins formed a potential single network, centred on the clusters around keratin 8, 18 and vimentin and the collagens. Whilst caution is needed as some edges are based solely on text mining, the data suggest a surprising cohesiveness.

## Supplementary Information 7: Analysis of pathways representation for IF Dataset

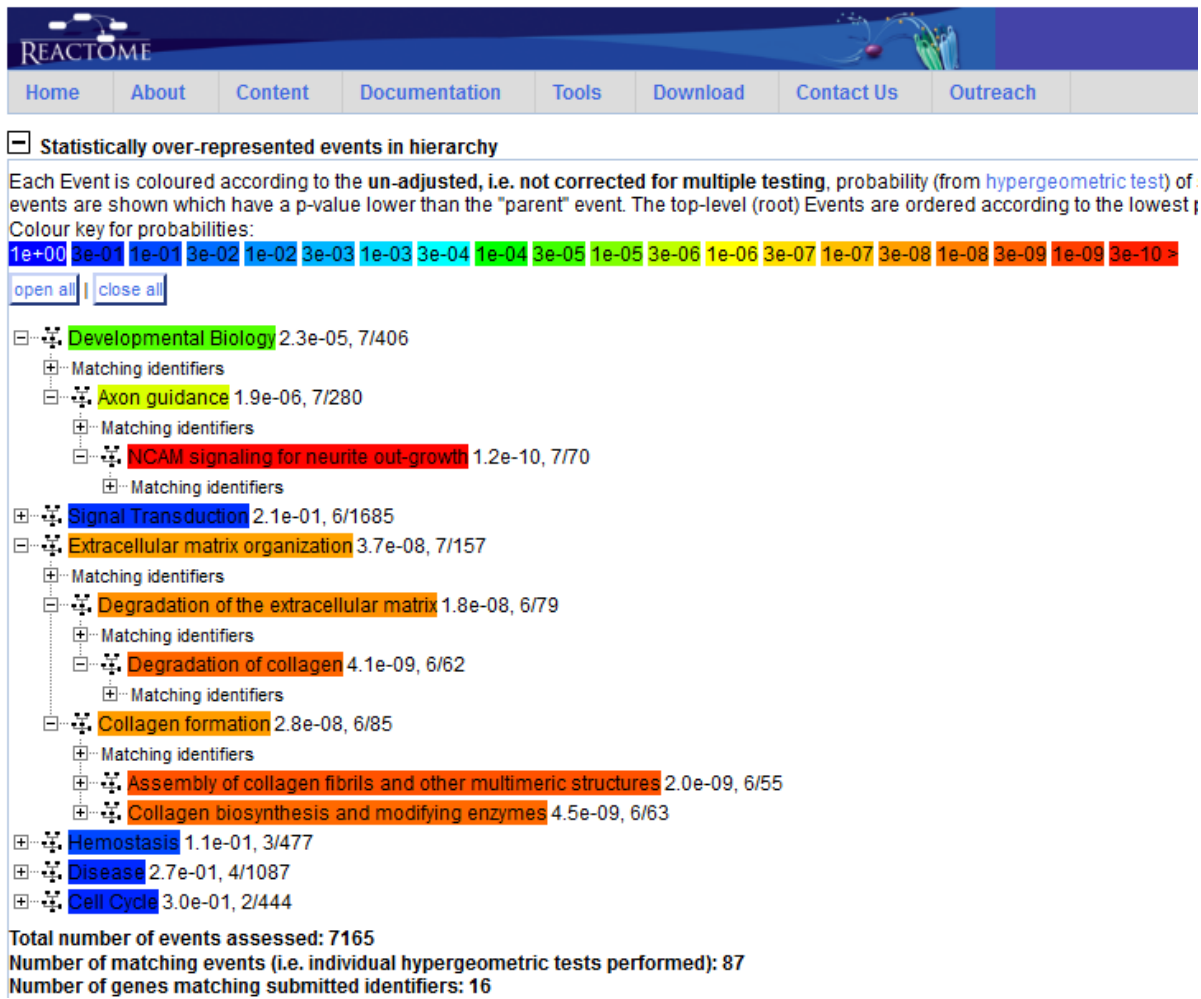

The entire sampleset listed in the table in section 5 was assessed using the pathways analysis tool in Reactome ([www.reactome.org](http://www.reactome.org)) on 18<sup>th</sup> February 2012. The Pathways identified as enriched are colour-coded as a heat-map and assigned a P-value following hypergeometric analysis. The data suggest that NCAM signalling for neurite outgrowth is highly over-represented ( $P > 1.2 \times 10^{-10}$ ). Other pathways over represented include collagen formation and modification. As the dataset are skewed for cytoskeletal and insoluble proteins, this is confirmatory that the fractionation is enriching correctly.

A tabulated version of these data is shown below.

| <b>Un-adjusted probability of seeing N or more genes in this Event by chance</b> | <b>Number of proteins in sample which map to this Event</b> | <b>Total number of proteins involved in this Event</b> | <b>Name of this Event</b>                                                                         |
|----------------------------------------------------------------------------------|-------------------------------------------------------------|--------------------------------------------------------|---------------------------------------------------------------------------------------------------|
| 2.73E-12                                                                         | 6                                                           | 20                                                     | Interaction of NCAM1 with collagens                                                               |
| 1.61E-11                                                                         | 6                                                           | 26                                                     | PDGF binds to extracellular matrix proteins                                                       |
| 1.22E-10                                                                         | 7                                                           | 70                                                     | NCAM signaling for neurite out-growth                                                             |
| 3.60E-10                                                                         | 6                                                           | 42                                                     | Secretion of collagens                                                                            |
| 4.83E-10                                                                         | 6                                                           | 44                                                     | NCAM1 interactions                                                                                |
| 4.83E-10                                                                         | 6                                                           | 44                                                     | Association of procollagen chains                                                                 |
| 5.56E-10                                                                         | 6                                                           | 45                                                     | PDI is a chaperone for collagen peptides                                                          |
| 6.39E-10                                                                         | 6                                                           | 46                                                     | Galactosylation of collagen propeptide hydroxylysines by PLOD3                                    |
| 6.39E-10                                                                         | 6                                                           | 46                                                     | Glucosylation of collagen propeptide hydroxylysines                                               |
| 7.31E-10                                                                         | 6                                                           | 47                                                     | Galactosylation of collagen propeptide hydroxylysines by procollagen galactosyltransferases 1, 2. |
| 8.35E-10                                                                         | 6                                                           | 48                                                     | Collagen prolyl 4-hydroxylase converts proline to 4-hydroxyproline                                |
| 8.35E-10                                                                         | 6                                                           | 48                                                     | Procollagen lysyl hydrolases convert lysine to 5-hydroxylysine                                    |
| 8.35E-10                                                                         | 6                                                           | 48                                                     | Procollagen triple helix formation                                                                |
| 1.08E-09                                                                         | 6                                                           | 50                                                     | Collagen prolyl 3-hydroxylase converts proline to 3-hydroxyproline                                |
| 1.95E-09                                                                         | 6                                                           | 55                                                     | Assembly of collagen fibrils and other multimeric structures                                      |
| 4.10E-09                                                                         | 6                                                           | 62                                                     | Degradation of collagen                                                                           |
| 4.53E-09                                                                         | 6                                                           | 63                                                     | Collagen biosynthesis and modifying enzymes                                                       |
| 1.81E-08                                                                         | 6                                                           | 79                                                     | Degradation of the extracellular matrix                                                           |
| 2.83E-08                                                                         | 6                                                           | 85                                                     | Collagen formation                                                                                |
| 3.72E-08                                                                         | 7                                                           | 157                                                    | Extracellular matrix organization                                                                 |
| 5.48E-08                                                                         | 4                                                           | 17                                                     | Gelatin degradation by MMP19                                                                      |
| 2.42E-07                                                                         | 4                                                           | 24                                                     | Gelatin degradation by MMP1, 2, 3, 7, 8, 9, 12, 13                                                |
| 1.93E-06                                                                         | 3                                                           | 11                                                     | Formation of collagen fibrils                                                                     |
| 1.93E-06                                                                         | 3                                                           | 11                                                     | Formation of collagen fibres                                                                      |
| 1.95E-06                                                                         | 7                                                           | 280                                                    | Axon guidance                                                                                     |
| 2.57E-06                                                                         | 3                                                           | 12                                                     | Collagen type VII binds laminin-322 and collagen IV                                               |
| 2.91E-06                                                                         | 6                                                           | 185                                                    | Signaling by PDGF                                                                                 |

|          |   |    |                                                            |
|----------|---|----|------------------------------------------------------------|
| 4.24E-06 | 3 | 14 | Formation of collagen networks                             |
| 5.30E-06 | 3 | 15 | Removal of fibrillar collagen N-propeptides                |
| 5.30E-06 | 3 | 15 | Removal of fibrillar collagen C-propeptides                |
| 5.30E-06 | 3 | 15 | Anchoring fibril formation                                 |
| 5.56E-06 | 2 | 2  | Formation of histidino-hydroxylysinonorleucine cross-links |
| 5.56E-06 | 2 | 2  | Formation of dehydro-lysinonorleucine cross-links          |
| 5.56E-06 | 2 | 2  | Formation of lysyl-pyrrole cross-links                     |
| 5.56E-06 | 2 | 2  | Formation of hydroxylysyl-pyridinoline cross-links         |
| 5.56E-06 | 2 | 2  | Formation of dehydro-hydroxylysino-norleucine cross-links  |
| 5.56E-06 | 2 | 2  | Formation of hydroxylysino-5-ketonorleucine cross-links    |
| 5.56E-06 | 2 | 2  | Formation of lysino-5-ketonorleucine cross-links           |
| 5.56E-06 | 2 | 2  | Formation of lysyl-pyridinoline cross-links                |
| 5.56E-06 | 2 | 2  | Formation of hydroxylysyl-pyrrole cross-links              |

## Supplementary Information 8: Soluble proteins entering iTRAQ workflow

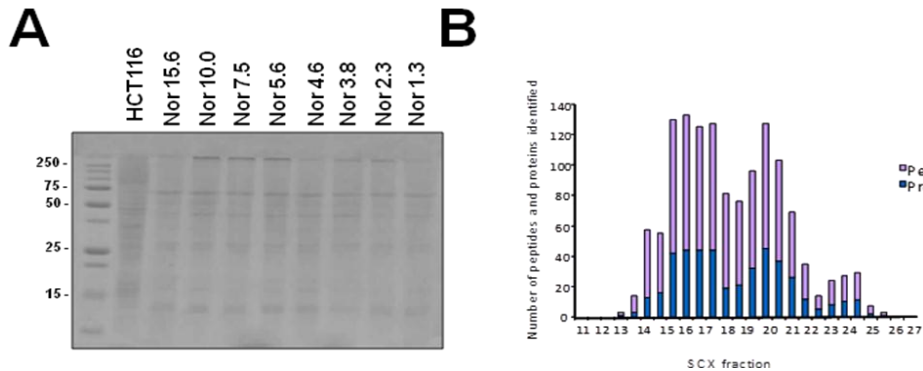

### Characterisation of proteins in IP unbound fraction

The abundance and variation in proteins present in the unbound IP fraction was determined by SDS-PAGE and silver-staining (Panel A). The figure shows large numbers of protein species in the sample, with a representative cross-section of molecular weights. These data demonstrate that the sample remains in good condition (little degradation) and is not skewed to species of any particular mass range. Samples were tryptic digested, iTRAQ-labelled and separated by SCX. The distribution of peptides/proteins across the SCX fractionation is shown in Panel B. In total 183 proteins were identified using this approach.

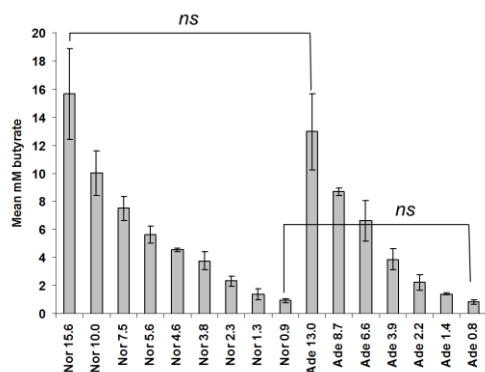

Panel C shows the pooling strategy. Subjects were stratified by diagnosis (Nor-normal, Ade-adenoma) and by the concentration of butyrate in faecal samples. Four subjects' worth of biopsies were required for a successful IP (data not shown). Mean butyrate level of subjects' faecal SCFA was determined for each pool, pools are signified by the diagnosis and mean butyrate, shown on the x-axis. There was no significant difference in the mean butyrate levels stools of the highest and lowest pools (T-test).



**Supplementary information 9: Table of proteins identified using the iTRAQ workflow on soluble protein extract**

| <i>Accession</i>     | <i>Score</i> | <i>#valid<br/>pept<br/>sequences</i> | <i>% Cov</i> | <i>Mass<br/>Da</i> | <i>pI</i> | <i>#<br/>peptides<br/>quant</i> | <i>Description</i>                                              |
|----------------------|--------------|--------------------------------------|--------------|--------------------|-----------|---------------------------------|-----------------------------------------------------------------|
| P31946_ISOFORM_Short | 42.5         | 6                                    | 18           | 27850              | 4.8       | 8                               | 14-3-3 protein beta/alpha, N-terminally processed [ISOFORM Sho  |
| P25398_CHAIN_0       | 7.4          | 1                                    | 8            | 14384              | 7.7       | 1                               | 40S ribosomal protein S12 [CHAIN 0]                             |
| P10809_CHAIN_0       | 25.9         | 4                                    | 8            | 57963              | 5.3       | 1                               | 60 kDa heat shock protein, mitochondrial (HSP-60) (Hsp60) (CPN  |
| P11021_CHAIN_0       | 18.3         | 3                                    | 5            | 70479              | 5.0       | 4                               | 78 kDa glucose-regulated protein (GRP-78) (BiP) [CHAIN 0]       |
| P00326_CHAIN_0       | 17.8         | 3                                    | 7            | 39736              | 8.7       | 5                               | Alcohol dehydrogenase 1C [CHAIN 0]                              |
| Q13747               | 22.5         | 3                                    | 15           | 22828              | 6.3       | 4                               | Alpha-1 antitrypsin;                                            |
| P02763_CHAIN_0       | 22.7         | 2                                    | 13           | 21560              | 5.1       | 8                               | Alpha-1-acid glycoprotein 1 (AGP 1) (OMD 1) [CHAIN 0]           |
| P19652_CHAIN_0       | 18.1         | 2                                    | 10           | 21651              | 5.2       | 2                               | Alpha-1-acid glycoprotein 2 (AGP 2) (OMD 2) [CHAIN 0]           |
| P02765_CHAIN_0       | 8.4          | 1                                    | 4            | 30222              | 4.6       | 1                               | Alpha-2-HS-glycoprotein chain B [CHAIN 0]                       |
| O43707               | 51.0         | 7                                    | 8            | 104854             | 5.3       | 5                               | Alpha-actinin-4                                                 |
| P06733_CHAIN_0       | 60.6         | 8                                    | 16           | 47038              | 7.6       | 18                              | Alpha-enolase (NNE) [CHAIN 0]                                   |
| P07355_CHAIN_0       | 14.1         | 2                                    | 6            | 38473              | 8.1       | 2                               | Annexin A2 (PAP-IV) [CHAIN 0]                                   |
| P08758_CHAIN_0       | 23.3         | 3                                    | 11           | 35806              | 5.0       | 1                               | Annexin A5 (CBP-I) (PAP-I) (PP4) (VAC-alpha) [CHAIN 0]          |
| Q5EFE6_CHAIN_0       | 29.4         | 3                                    | 17           | 23495              | 8.6       | 5                               | Anti-RhD monoclonal T125 kappa light chain; [CHAIN 0]           |
| P02647_CHAIN_1       | 51.7         | 7                                    | 28           | 27950              | 5.4       | 17                              | Apolipoprotein A-I(1-242) [CHAIN 1]                             |
| A8K092               | 62.0         | 9                                    | 18           | 54494              | 8.5       | 13                              | ATP synthase subunit alpha                                      |
| Q0QEN7               | 40.1         | 5                                    | 16           | 48113              | 5.0       | 6                               | ATP synthase subunit beta                                       |
| B7Z3U6               | 21.4         | 3                                    | 3            | 109550             | 5.2       | 4                               | ATPase, Na+/K+ transporting, alpha 1 polypeptide, isoform CRA_  |
| P61769_CHAIN_1       | 13.7         | 2                                    | 16           | 11618              | 6.5       | 3                               | Beta-2-microglobulin form pI 5.3 [CHAIN 1]                      |
| Q71UM7               | 9.8          | 1                                    | 8            | 13869              | 4.8       | 4                               | Beta-subunit signal transducing proteins GS/GI;                 |
| Q12864_CHAIN_0       | 30.2         | 4                                    | 5            | 89761              | 5.0       | 4                               | Cadherin-17 (LI-cadherin) [CHAIN 0]                             |
| A8K714_CHAIN_0       | 68.1         | 8                                    | 9            | 97914              | 6.0       | 14                              | Calcium-activated chloride channel regulator 1 (hCLCA1) (CaCC-1 |
| Q9BRL5               | 13.8         | 2                                    | 12           | 16507              | 4.4       | 3                               | CALM3 protein;                                                  |
| P27797_CHAIN_0       | 35.4         | 6                                    | 12           | 46466              | 4.3       | 1                               | Calreticulin (ERp60) [CHAIN 0]                                  |
| P00915_CHAIN_0       | 20.2         | 3                                    | 12           | 28739              | 6.9       | 8                               | Carbonic anhydrase 1 (CA-I) (CAB) [CHAIN 0]                     |
| P00918_CHAIN_0       | 17.7         | 3                                    | 13           | 29115              | 7.2       | 4                               | Carbonic anhydrase 2 (CA-II) (CAC) [CHAIN 0]                    |
| O00748_CHAIN_0       | 6.6          | 1                                    | 2            | 58951              | 5.4       | 1                               | Carboxylesterase 2 (CE-2) (hCE-2) [CHAIN 0]                     |
| P07339_CHAIN_0       | 15.1         | 2                                    | 6            | 37852              | 5.8       | 5                               | Cathepsin D heavy chain [CHAIN 0]                               |
| Q9H5A3               | 14.9         | 2                                    | 8            | 29391              | 5.1       | 1                               | CD44 molecule (Indian blood group);                             |
| B3KML9               | 70.1         | 8                                    | 19           | 44602              | 4.9       | 22                              | cDNA FLJ11352 fis, clone HEMBA1000020, highly similar to Tubul  |
| Q9NXQ7               | 13.5         | 2                                    | 7            | 31778              | 9.5       | 4                               | cDNA FLJ20106 fis, clone COL04830;                              |
| Q9NXM7               | 7.8          | 1                                    | 5            | 16519              | 8.3       | 2                               | CDNA FLJ20154 fis, clone COL08740;                              |
| B3KPS3               | 41.0         | 4                                    | 13           | 46241              | 5.0       | 13                              | cDNA FLJ32131 fis, clone PEBLM2000267, highly similar to Tubuli |
| B3KSG9               | 10.1         | 1                                    | 2            | 65431              | 7.2       | 1                               | cDNA FLJ36188 fis, clone TESTI2027179, highly similar to Transm |
| B3KSV9               | 15.6         | 2                                    | 7            | 29437              | 6.5       | 2                               | cDNA FLJ37148 fis, clone BRACE2025333, highly similar to Homo   |
| B3KT41               | 6.2          | 1                                    | 1            | 77279              | 4.9       | 1                               | cDNA FLJ37598 fis, clone BRCCOC2008642, highly similar to Synap |
| B3KTT5               | 23.2         | 3                                    | 7            | 51917              | 5.4       | 4                               | cDNA FLJ38698 fis, clone KIDNE2002015, highly similar to HEAT S |
| B4DW73               | 19.5         | 3                                    | 5            | 55953              | 6.9       | 3                               | cDNA FLJ50710, highly similar to Phosphoenolpyruvate carboxyky  |
| B4E1S2               | 12.0         | 1                                    | 8            | 15645              | 5.0       | 1                               | cDNA FLJ51185, highly similar to Annexin A4;                    |
| B4DRT4               | 6.5          | 1                                    | 5            | 17326              | 5.8       | 2                               | cDNA FLJ51535, highly similar to Phosphatidylethanolamine-bind  |

|                  |       |    |    |        |      |    |                                                                                           |
|------------------|-------|----|----|--------|------|----|-------------------------------------------------------------------------------------------|
| B4DP56           | 31.2  | 4  | 12 | 38694  | 5.3  | 8  | cDNA FLJ52237, highly similar to Creatine kinase B-type (EC 2.7.3.3);                     |
| B4DL87           | 16.2  | 2  | 10 | 18536  | 6.9  | 1  | cDNA FLJ52243, highly similar to Heat-shock protein beta-1;                               |
| B4DNR3           | 8.8   | 1  | 5  | 19797  | 6.1  | 1  | cDNA FLJ52710, highly similar to Abhydrolase domain-containing protein 1;                 |
| B4E335           | 108.6 | 12 | 36 | 39226  | 5.5  | 44 | cDNA FLJ52842, highly similar to Actin, cytoplasmic 1;                                    |
| B7Z504           | 6.6   | 1  | 5  | 18406  | 10.1 | 1  | cDNA FLJ52950;                                                                            |
| B4DFY0           | 29.5  | 4  | 8  | 61575  | 5.1  | 1  | cDNA FLJ53313, highly similar to Alpha-actinin-1;                                         |
| B7Z2X4           | 26.2  | 4  | 5  | 77789  | 5.5  | 5  | cDNA FLJ53327, highly similar to Gelsolin;                                                |
| B4DP93           | 21.2  | 3  | 4  | 87544  | 5.5  | 3  | cDNA FLJ53437, highly similar to Major vault protein;                                     |
| B4E2L8           | 7.6   | 1  | 2  | 70344  | 5.2  | 1  | cDNA FLJ53487, highly similar to Coagulation factor XIII A chain (F13A1);                 |
| B7Z6P1           | 94.7  | 11 | 33 | 38579  | 5.3  | 1  | cDNA FLJ53662, highly similar to Actin, alpha skeletal muscle;                            |
| B4E1B2           | 75.3  | 10 | 17 | 74832  | 7.0  | 12 | cDNA FLJ53691, highly similar to Serotransferrin;                                         |
| B4DQG5           | 7.7   | 1  | 2  | 39346  | 9.5  | 1  | cDNA FLJ54122, highly similar to Cytosol aminopeptidase (EC 3.4.11.1);                    |
| B4DZ95           | 7.2   | 1  | 2  | 92772  | 6.5  | 1  | cDNA FLJ54570, highly similar to 2-oxoglutarate dehydrogenase E1; mitochondrial;          |
| B4DLK2           | 7.1   | 1  | 9  | 13098  | 5.9  | 1  | cDNA FLJ55097, highly similar to Adenylate kinase isoenzyme 2, rat;                       |
| B4DSS4           | 8.3   | 1  | 1  | 106116 | 5.7  | 4  | cDNA FLJ56631;                                                                            |
| B4DKN9           | 13.2  | 2  | 9  | 19570  | 8.7  | 1  | cDNA FLJ57740, highly similar to Transforming protein RhoA;                               |
| B4DDF3           | 6.4   | 1  | 4  | 30029  | 9.7  | 1  | cDNA FLJ58050, highly similar to Interleukin enhancer-binding factor 1;                   |
| B4E1R7           | 11.5  | 2  | 3  | 60507  | 5.0  | 1  | cDNA FLJ58224, highly similar to Calpain-2 catalytic subunit (EC 3.4.22.1);               |
| B4DQ92           | 8.6   | 1  | 2  | 49616  | 4.7  | 1  | cDNA FLJ59379, highly similar to Hematopoietic lineage cell-specific protein 1;           |
| B4DKG3           | 6.2   | 1  | 5  | 12169  | 8.6  | 1  | cDNA FLJ60631, moderately similar to Scaffold attachment factor 1;                        |
| B4DTV8           | 6.6   | 1  | 1  | 135871 | 5.1  | 1  | cDNA FLJ61399, highly similar to Spectrin alpha chain, brain;                             |
| B3KQT9           | 36.5  | 5  | 10 | 54102  | 7.1  | 6  | cDNA PSEC0175 fis, clone OVARC1000169, highly similar to Proteoglycan 4;                  |
| B2R4P2           | 11.9  | 2  | 10 | 22201  | 8.8  | 2  | cDNA, FLJ92164, highly similar to Homo sapiens peroxiredoxin 1;                           |
| B2R4V4           | 7.1   | 1  | 14 | 10016  | 6.6  | 2  | cDNA, FLJ92232, highly similar to Homo sapiens barrier to autophagy 1;                    |
| B2R5M8           | 27.3  | 3  | 7  | 46649  | 6.8  | 4  | cDNA, FLJ92536, highly similar to Homo sapiens isocitrate dehydrogenase 2, cytosolic;     |
| B2R9J0           | 6.8   | 1  | 2  | 53500  | 6.2  | 1  | cDNA, FLJ94418, highly similar to Homo sapiens inositol 1,4,5-trisphosphate 3-kinase;     |
| B2RB23           | 12.9  | 2  | 5  | 42009  | 8.7  | 1  | cDNA, FLJ95265, highly similar to Homo sapiens acetyl-Coenzyme A synthetase 2, cytosolic; |
| Q9UNM1           | 28.7  | 4  | 31 | 10295  | 9.3  | 21 | Chaperonin 10-related protein;                                                            |
| Q0QEL2           | 13.2  | 2  | 10 | 24926  | 6.6  | 4  | Citrate synthase                                                                          |
| Q549M8           | 7.0   | 1  | 3  | 28068  | 6.4  | 1  | CLE7;                                                                                     |
| P23528_CHAIN_0   | 34.0  | 5  | 29 | 18371  | 8.5  | 5  | Cofilin-1 (p18) [CHAIN 0]                                                                 |
| P12532_CHAIN_0   | 22.1  | 4  | 11 | 43080  | 7.8  | 1  | Creatine kinase U-type, mitochondrial (U-MtCK) (Mia-CK) [CHAIN 0]                         |
| C6KXN3           | 14.2  | 2  | 7  | 24742  | 5.7  | 1  | Cyclosporin A transporter 1;                                                              |
| P04080           | 20.6  | 3  | 34 | 11140  | 7.9  | 8  | Cystatin-B                                                                                |
| P13073_CHAIN_0   | 13.3  | 2  | 14 | 17200  | 9.3  | 4  | Cytochrome c oxidase subunit 4 isoform 1, mitochondrial (COX IV) [CHAIN 0]                |
| P20674_CHAIN_0   | 8.0   | 1  | 9  | 12501  | 5.0  | 1  | Cytochrome c oxidase subunit 5A, mitochondrial [CHAIN 0]                                  |
| P53634_CHAIN_1   | 11.1  | 1  | 7  | 18473  | 6.2  | 1  | Dipeptidyl peptidase 1 light chain [CHAIN 1]                                              |
| P68104           | 45.7  | 6  | 15 | 50141  | 9.2  | 9  | Elongation factor 1-alpha 1 (EF-1-alpha-1) (eEF1A-1) (EF-Tu)                              |
| P30040_CHAIN_0   | 7.2   | 1  | 4  | 25853  | 6.9  | 1  | Endoplasmic reticulum resident protein 29 (ERp29) (ERp31) (ERp32) [CHAIN 0]               |
| P14625_CHAIN_0   | 87.3  | 12 | 13 | 90178  | 4.7  | 10 | Endoplasmic reticulum chaperone protein 94 kDa (GRP94) [CHAIN 0]                          |
| P10645_PEPT_12   | 8.8   | 1  | 24 | 4233   | 4.8  | 2  | ER-37 [PEPTIDE 12]                                                                        |
| Q5HY54           | 29.7  | 5  | 2  | 276550 | 5.7  | 1  | Filamin A, alpha (Actin binding protein 280);                                             |
| O75369_ISOFORM_5 | 20.2  | 3  | 1  | 230320 | 5.4  | 1  | Filamin-B (FLN-B) (Truncated ABP) (Fh1) [ISOFORM 5]                                       |
| P04075_CHAIN_0   | 47.7  | 6  | 16 | 39289  | 8.5  | 10 | Fructose-bisphosphate aldolase A [CHAIN 0]                                                |
| Q86TY5           | 38.4  | 5  | 41 | 13897  | 9.5  | 15 | Full-length cDNA clone CS0DI041YE05 of Placenta of Homo sapiens;                          |
| P09382_CHAIN_0   | 14.2  | 2  | 15 | 14585  | 5.6  | 2  | Galectin-1 (Gal-1) (HLBP14) [CHAIN 0]                                                     |

|                |      |    |    |        |      |    |                                                                      |
|----------------|------|----|----|--------|------|----|----------------------------------------------------------------------|
| P56470         | 46.6 | 6  | 16 | 35941  | 9.3  | 18 | Galectin-4 (Gal-4) (L36LBP)                                          |
| Q5TGM9         | 6.9  | 1  | 10 | 13291  | 5.8  | 2  | GDP-mannose 4,6-dehydratase;                                         |
| B4DE36         | 10.0 | 1  | 3  | 60186  | 8.4  | 1  | Glucose-6-phosphate isomerase                                        |
| Q14400         | 16.5 | 2  | 11 | 28695  | 8.4  | 2  | GLUD1 protein;                                                       |
| Q5TA02         | 6.7  | 1  | 5  | 23341  | 7.6  | 1  | Glutathione S-transferase omega 1;                                   |
| P04406_CHAIN_0 | 61.2 | 8  | 24 | 35922  | 8.8  | 13 | Glyceraldehyde-3-phosphate dehydrogenase (GAPDH) [CHAIN 0]           |
| P11216_CHAIN_0 | 28.2 | 4  | 6  | 96565  | 6.5  | 4  | Glycogen phosphorylase, brain form [CHAIN 0]                         |
| P00738_CHAIN_2 | 29.1 | 5  | 17 | 27265  | 6.5  | 5  | Haptoglobin beta chain [CHAIN 2]                                     |
| B4DMJ7         | 8.5  | 1  | 9  | 14526  | 5.9  | 1  | HCG2015269, isoform CRA_c;                                           |
| P07900_CHAIN_0 | 44.0 | 6  | 7  | 84529  | 5.0  | 6  | Heat shock protein HSP 90-alpha (HSP 86) (HSP86) [CHAIN 0]           |
| P08238_CHAIN_0 | 45.4 | 6  | 8  | 83133  | 5.0  | 13 | Heat shock protein HSP 90-beta (HSP 90) (HSP 84) (HSP84) [CHAIN 0]   |
| P69905_CHAIN_0 | 40.2 | 4  | 31 | 15126  | 9.1  | 30 | Hemoglobin subunit alpha [CHAIN 0]                                   |
| Q8IZP7         | 6.5  | 1  | 2  | 54844  | 6.5  | 2  | Heparan-sulfate 6-O-sulfotransferase 3 (HS6ST-3)                     |
| Q9NYD7         | 9.3  | 1  | 24 | 5865   | 9.9  | 1  | High mobility group 1 protein;                                       |
| O00479_CHAIN_0 | 6.6  | 1  | 8  | 9408   | 10.6 | 1  | High mobility group nucleosome-binding domain-containing protein 1   |
| Q96IS6         | 32.2 | 5  | 11 | 64673  | 5.4  | 5  | HSPA8 protein;                                                       |
| P54868_CHAIN_0 | 32.8 | 4  | 9  | 52383  | 7.0  | 6  | Hydroxymethylglutaryl-CoA synthase, mitochondrial (HMG-CoA synthase) |
| P01876         | 56.0 | 6  | 17 | 37655  | 6.3  | 22 | Ig alpha-1 chain C region                                            |
| P01857         | 33.8 | 4  | 13 | 36106  | 8.6  | 5  | Ig gamma-1 chain C region                                            |
| P01860         | 37.5 | 5  | 15 | 41287  | 8.4  | 10 | Ig gamma-3 chain C region                                            |
| P01871         | 20.3 | 3  | 7  | 49307  | 6.6  | 2  | Ig mu chain C region                                                 |
| Q9Y6R7_CHAIN_0 | 30.9 | 4  | 1  | 569345 | 5.2  | 9  | IgG Fc-binding protein (Fc gamma BP) [CHAIN 0]                       |
| Q6P5S8         | 34.5 | 4  | 19 | 25773  | 6.3  | 11 | IGK@ protein;                                                        |
| P48735         | 22.6 | 3  | 6  | 50909  | 9.0  | 1  | Isocitrate dehydrogenase [NADP], mitochondrial (IDH)                 |
| P05783_CHAIN_0 | 30.0 | 5  | 10 | 47927  | 5.4  | 2  | Keratin, type I cytoskeletal 18 (CK-18) (K18) [CHAIN 0]              |
| P08727         | 79.7 | 8  | 20 | 44092  | 5.1  | 17 | Keratin, type I cytoskeletal 19 (CK-19) (K19)                        |
| P05787_CHAIN_0 | 93.7 | 13 | 25 | 53573  | 5.6  | 25 | Keratin, type II cytoskeletal 8 (CK-8) (K8) [CHAIN 0]                |
| O60382         | 6.9  | 1  | 1  | 191307 | 11.9 | 1  | KIAA0324;                                                            |
| Q5TCJ4         | 8.0  | 1  | 2  | 53250  | 6.2  | 2  | Lamin A/C;                                                           |
| Q6NVH9         | 37.0 | 5  | 20 | 26197  | 8.9  | 1  | Lectin, galactoside-binding, soluble, 3;                             |
| P68871_CHAIN_0 | 87.5 | 8  | 59 | 15867  | 7.3  | 80 | LVV-hemorphin-7 [CHAIN 0]                                            |
| Q0QF37         | 38.5 | 6  | 17 | 31969  | 8.4  | 7  | Malate dehydrogenase                                                 |
| Q16853_CHAIN_0 | 13.5 | 2  | 2  | 84491  | 6.1  | 4  | Membrane primary amine oxidase (SSAO) (VAP-1) [CHAIN 0]              |
| Q02817_CHAIN_0 | 35.0 | 6  | 1  | 538420 | 5.5  | 2  | Mucin-2 (MUC-2) [CHAIN 0]                                            |
| Q6IBG5         | 8.4  | 1  | 8  | 12970  | 4.7  | 2  | MYL6 protein;                                                        |
| P35579_CHAIN_0 | 41.0 | 6  | 4  | 226401 | 5.5  | 6  | Myosin-9 (NMMHC II-a) (NMMHC-IIA) (NMMHC-A) [CHAIN 0]                |
| O95178_CHAIN_0 | 6.3  | 1  | 14 | 8642   | 4.4  | 1  | NADH dehydrogenase [ubiquinone] 1 beta subcomplex subunit 2          |
| Q14697_CHAIN_0 | 31.5 | 4  | 5  | 103975 | 5.6  | 3  | Neutral alpha-glucosidase AB [CHAIN 0]                               |
| P10153_CHAIN_0 | 10.9 | 1  | 11 | 15464  | 9.4  | 3  | Non-secretory ribonuclease (RNase 2) [CHAIN 0]                       |
| P62937_CHAIN_0 | 45.9 | 7  | 38 | 17881  | 8.4  | 11 | Peptidyl-prolyl cis-trans isomerase A (PPIase A) [CHAIN 0]           |
| P30044_CHAIN_0 | 19.4 | 2  | 14 | 17031  | 7.7  | 11 | Peroxiredoxin-5, mitochondrial (Prx-V) (AOEB166) [CHAIN 0]           |
| B4E1H9         | 12.9 | 2  | 5  | 35046  | 8.7  | 4  | Phosphoglycerate kinase                                              |
| P68402         | 6.6  | 1  | 4  | 25569  | 5.7  | 1  | Platelet-activating factor acetylhydrolase IB subunit beta (PAF-AH1) |
| Q9BXV5         | 7.6  | 1  | 7  | 22739  | 6.0  | 1  | PNAS-139;                                                            |
| P07737_CHAIN_0 | 41.8 | 5  | 43 | 14923  | 8.8  | 18 | Profilin-1 [CHAIN 0]                                                 |
| Q06323         | 19.0 | 3  | 12 | 28723  | 6.0  | 2  | Proteasome activator complex subunit 1 (PA28alpha) (PA28a) (R26)     |

|                  |       |    |    |        |      |     |                                                                 |
|------------------|-------|----|----|--------|------|-----|-----------------------------------------------------------------|
| B4EOX6           | 9.7   | 1  | 9  | 14624  | 9.1  | 1   | Proteasome subunit alpha type                                   |
| P07237_CHAIN_0   | 41.1  | 7  | 13 | 55294  | 4.7  | 5   | Protein disulfide-isomerase (PDI) [CHAIN 0]                     |
| Q99497           | 6.6   | 1  | 4  | 19891  | 6.8  | 4   | Protein DJ-1                                                    |
| Q5VWP2           | 6.5   | 1  | 2  | 44944  | 5.5  | 2   | Protein FAM46C                                                  |
| Q2VXS9           | 7.0   | 1  | 1  | 76755  | 6.3  | 1   | Proto-oncogene c-fes variant 2;                                 |
| C9J3E2           | 17.8  | 2  | 14 | 15014  | 9.2  | 4   | Putative uncharacterized protein AGR2;                          |
| C9JFR7           | 14.6  | 1  | 11 | 11333  | 9.8  | 4   | Putative uncharacterized protein CYCS;                          |
| Q9NTC4           | 14.5  | 2  | 4  | 47557  | 4.8  | 1   | Putative uncharacterized protein DKFZp434K0126;                 |
| Q9Y436           | 6.2   | 1  | 3  | 20483  | 5.7  | 1   | Putative uncharacterized protein DKFZp586M2023;                 |
| Q5JPE4           | 6.4   | 1  | 6  | 20393  | 6.5  | 1   | Putative uncharacterized protein DKFZp667O202;                  |
| Q68DG4           | 16.3  | 2  | 8  | 21507  | 7.9  | 6   | Putative uncharacterized protein DKFZp686A15170;                |
| C9J7B5           | 6.7   | 1  | 11 | 11945  | 8.6  | 2   | Putative uncharacterized protein EIF5A2;                        |
| A8MW49           | 27.6  | 4  | 28 | 13808  | 5.5  | 5   | Putative uncharacterized protein FABP1;                         |
| A8MX94           | 12.2  | 2  | 9  | 19480  | 6.1  | 1   | Putative uncharacterized protein GSTP1;                         |
| C9JEY0           | 14.5  | 2  | 12 | 16129  | 10.2 | 3   | Putative uncharacterized protein HADHB;                         |
| B8ZZ37           | 23.2  | 3  | 13 | 34202  | 9.1  | 4   | Putative uncharacterized protein HNRNPA2B1;                     |
| C9JA05           | 6.3   | 1  | 11 | 8168   | 9.2  | 1   | Putative uncharacterized protein IGJ;                           |
| D3YTI4           | 19.4  | 3  | 12 | 26712  | 8.6  | 3   | Putative uncharacterized protein LDHA;                          |
| C9J9K3           | 16.9  | 2  | 8  | 29506  | 5.3  | 3   | Putative uncharacterized protein RPSA;                          |
| A6NMW4           | 6.8   | 1  | 7  | 18342  | 7.8  | 1   | Putative uncharacterized protein SNX12;                         |
| C9J0K6           | 15.8  | 2  | 12 | 17605  | 5.8  | 4   | Putative uncharacterized protein SRI;                           |
| C9JGI3           | 7.2   | 1  | 3  | 46087  | 5.5  | 1   | Putative uncharacterized protein TYMP;                          |
| C9JQ8            | 8.0   | 1  | 1  | 58852  | 10.1 | 1   | Putative uncharacterized protein ZNF584;                        |
| Q8WUW7           | 28.4  | 4  | 14 | 37276  | 8.7  | 6   | Pyruvate kinase                                                 |
| Q8WVC2           | 8.4   | 1  | 11 | 8850   | 9.1  | 1   | RPS21 protein;                                                  |
| D3DV39           | 24.6  | 4  | 34 | 10180  | 5.6  | 1   | S100 calcium binding protein A6 (Calcyclin), isoform CRA_a;     |
| Q13228_ISOFORM_2 | 41.8  | 5  | 15 | 45349  | 6.1  | 6   | Selenium-binding protein 1 (SBP56) (SP56) [ISOFORM 2]           |
| P02768_CHAIN_0   | 221.3 | 28 | 38 | 66472  | 5.7  | 121 | Serum albumin [CHAIN 0]                                         |
| Q9Y566_ISOFORM_2 | 6.1   | 1  | 1  | 158792 | 7.1  | 8   | SH3 and multiple ankyrin repeat domains protein 1 (Shank1) (SST |
| Q59EP7           | 16.3  | 2  | 8  | 29347  | 9.8  | 5   | Solute carrier family 25 member 4 variant;                      |
| B4E3K9           | 9.2   | 1  | 9  | 18262  | 8.8  | 2   | Superoxide dismutase                                            |
| A8MST3           | 6.8   | 1  | 5  | 13909  | 5.9  | 2   | Superoxide dismutase [Cu-Zn]                                    |
| P23381_CHAIN_2   | 9.4   | 1  | 4  | 43329  | 7.6  | 2   | T2-TrpRS [CHAIN 2]                                              |
| O60744           | 22.8  | 3  | 37 | 9321   | 6.7  | 9   | Thioredoxin delta 3;                                            |
| P30048_CHAIN_0   | 7.3   | 1  | 6  | 21468  | 6.0  | 2   | Thioredoxin-dependent peroxide reductase, mitochondrial (Prx-l  |
| A8MW06_PEPT_0    | 15.1  | 2  | 30 | 4931   | 5.3  | 1   | Thymosin beta-4-like protein 3 [PEPTIDE 0]                      |
| Q5VU62           | 39.4  | 6  | 30 | 18493  | 4.7  | 2   | TPM3 protein;                                                   |
| Q53GC9           | 27.8  | 4  | 21 | 20889  | 9.0  | 6   | Transgelin variant;                                             |
| P37802_CHAIN_0   | 45.3  | 6  | 23 | 22260  | 8.8  | 4   | Transgelin-2 [CHAIN 0]                                          |
| Q53WY6           | 10.3  | 1  | 30 | 4570   | 9.2  | 1   | Transthyretin;                                                  |
| Q07654_CHAIN_0   | 7.7   | 1  | 19 | 6580   | 5.7  | 2   | Trefoil factor 3 (hITF) (hP1.B) [CHAIN 0]                       |
| P60174_CHAIN_0   | 36.1  | 4  | 19 | 26538  | 7.1  | 13  | Triosephosphate isomerase (TIM) [CHAIN 0]                       |
| O14773_CHAIN_0   | 15.4  | 2  | 7  | 39790  | 5.9  | 1   | Tripeptidyl-peptidase 1 (TPP-1) (TPP-I) (LPIC) [CHAIN 0]        |
| P09493_ISOFORM_6 | 42.8  | 7  | 19 | 32649  | 4.7  | 2   | Tropomyosin alpha-1 chain [ISOFORM 6]                           |
| P67936_ISOFORM_2 | 46.4  | 7  | 20 | 32723  | 4.7  | 5   | Tropomyosin alpha-4 chain [ISOFORM 2]                           |
| D2E6S1           | 6.6   | 1  | 5  | 25031  | 6.4  | 2   | Tryptase beta I;                                                |

|                  |      |   |    |        |     |    |                                                               |
|------------------|------|---|----|--------|-----|----|---------------------------------------------------------------|
| P62988           | 16.3 | 2 | 20 | 8565   | 8.1 | 5  | Ubiquitin                                                     |
| Q16851_ISOFORM_2 | 9.7  | 1 | 2  | 55677  | 8.2 | 1  | UTP--glucose-1-phosphate uridylyltransferase (UDPGP) (UGPase) |
| B0YJC4           | 63.6 | 8 | 20 | 49653  | 5.2 | 20 | Vimentin variant 3;                                           |
| Q9H0D2_ISOFORM_2 | 8.5  | 1 | 1  | 116894 | 8.5 | 1  | Zinc finger protein 541 [ISOFORM 2]                           |
| O60844_CHAIN_0   | 14.8 | 2 | 20 | 16661  | 9.6 | 1  | Zymogen granule membrane protein 16 (Zymogen granule prote    |

### Supplementary Information 10: Analysis of pathways representation of soluble fraction

| Name of this Event                                             | Un-adjusted probability of seeing N or more genes in this Event by chance | Number of identifiers dataset which map to this Event | Total number of identifiers involved in this Event |
|----------------------------------------------------------------|---------------------------------------------------------------------------|-------------------------------------------------------|----------------------------------------------------|
| Platelet degranulation                                         | 1.20E-08                                                                  | 10                                                    | 78                                                 |
| Response to elevated platelet cytosolic Ca <sup>2+</sup>       | 2.22E-08                                                                  | 10                                                    | 83                                                 |
| Glucose metabolism                                             | 3.66E-07                                                                  | 8                                                     | 62                                                 |
| Uptake of Carbon Dioxide and Release of Oxygen by Erythrocytes | 1.00E-06                                                                  | 4                                                     | 8                                                  |
| Uptake of Oxygen and Release of Carbon Dioxide by Erythrocytes | 1.00E-06                                                                  | 4                                                     | 8                                                  |
| O <sub>2</sub> /CO <sub>2</sub> exchange in erythrocytes       | 1.00E-06                                                                  | 4                                                     | 8                                                  |
| Release of (inferred) platelet cytosolic components            | 5.44E-06                                                                  | 3                                                     | 4                                                  |
| Glycolysis                                                     | 1.05E-05                                                                  | 5                                                     | 27                                                 |
| Metabolism                                                     | 1.07E-05                                                                  | 33                                                    | 1442                                               |
| Activation of Chaperone Genes by ATF6-alpha                    | 1.35E-05                                                                  | 3                                                     | 5                                                  |
| Platelet activation, signaling and aggregation                 | 1.56E-05                                                                  | 11                                                    | 205                                                |
| Sema3A PAK dependent Axon repulsion                            | 1.84E-05                                                                  | 4                                                     | 15                                                 |
| Gluconeogenesis                                                | 2.14E-05                                                                  | 5                                                     | 31                                                 |
| Citric acid cycle (TCA cycle)                                  | 5.06E-05                                                                  | 4                                                     | 19                                                 |
| Activation of Chaperones by ATF6-alpha                         | 7.38E-05                                                                  | 3                                                     | 8                                                  |
| Semaphorin interactions                                        | 8.85E-05                                                                  | 6                                                     | 66                                                 |

Protein identifiers covering the list of all identified proteins were entered into Reactome Instance Browser (accessed 27.02.13). Pathways and subpathways with a P-value <10<sup>-4</sup> are listed, along with information on proportion of pathway identified.

## Supplementary Information 11: Protein interaction pathways in the soluble fraction

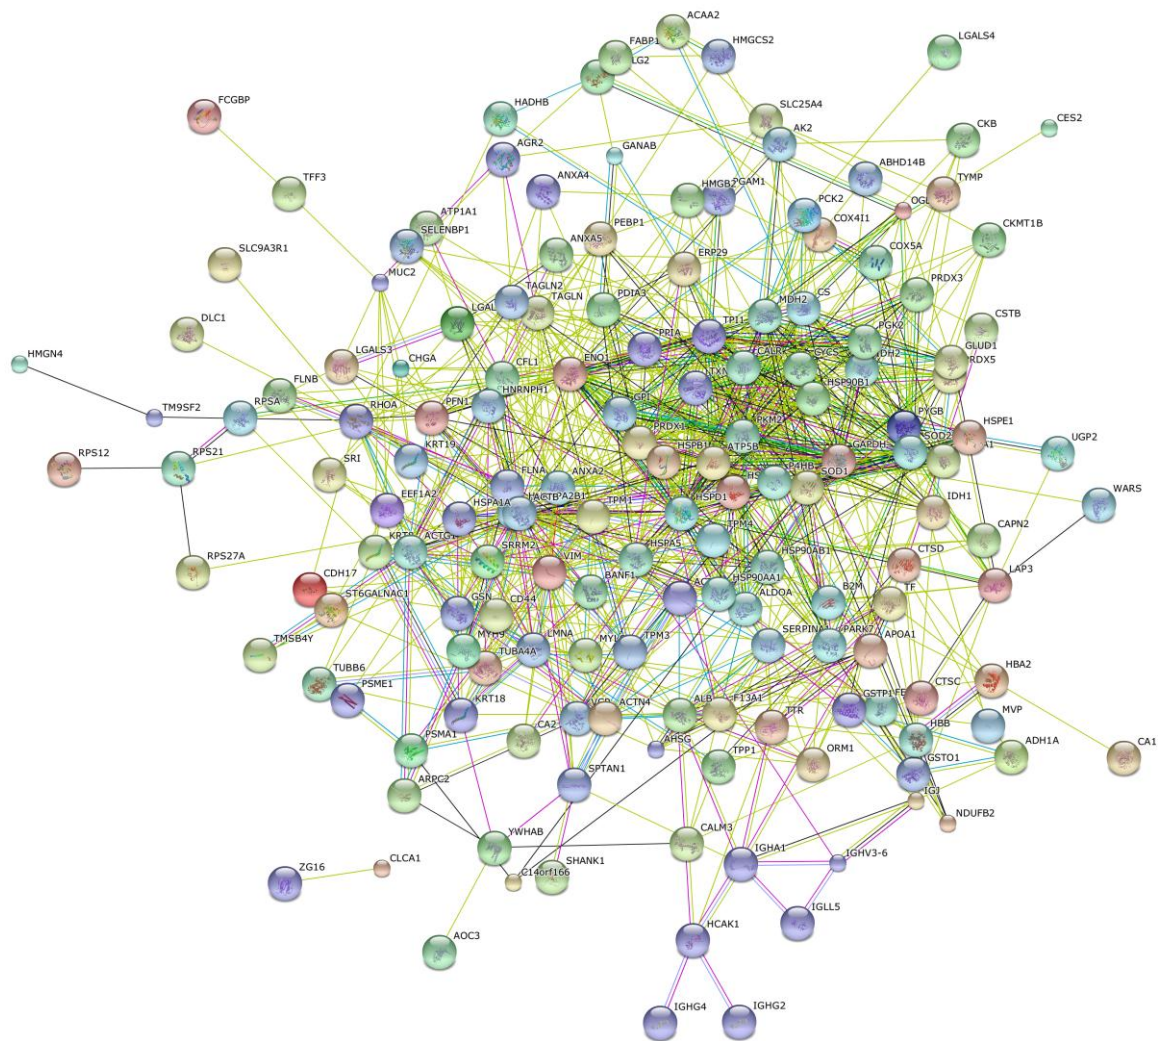

Part A. A protein interaction network was generated from the list of identified proteins in section 9 above. The network was generated in STRINGS version 9.0 (accession date 27.02.13). Orphan nodes are excluded from the representation. The above version includes information from text mining, represented by a green edge.

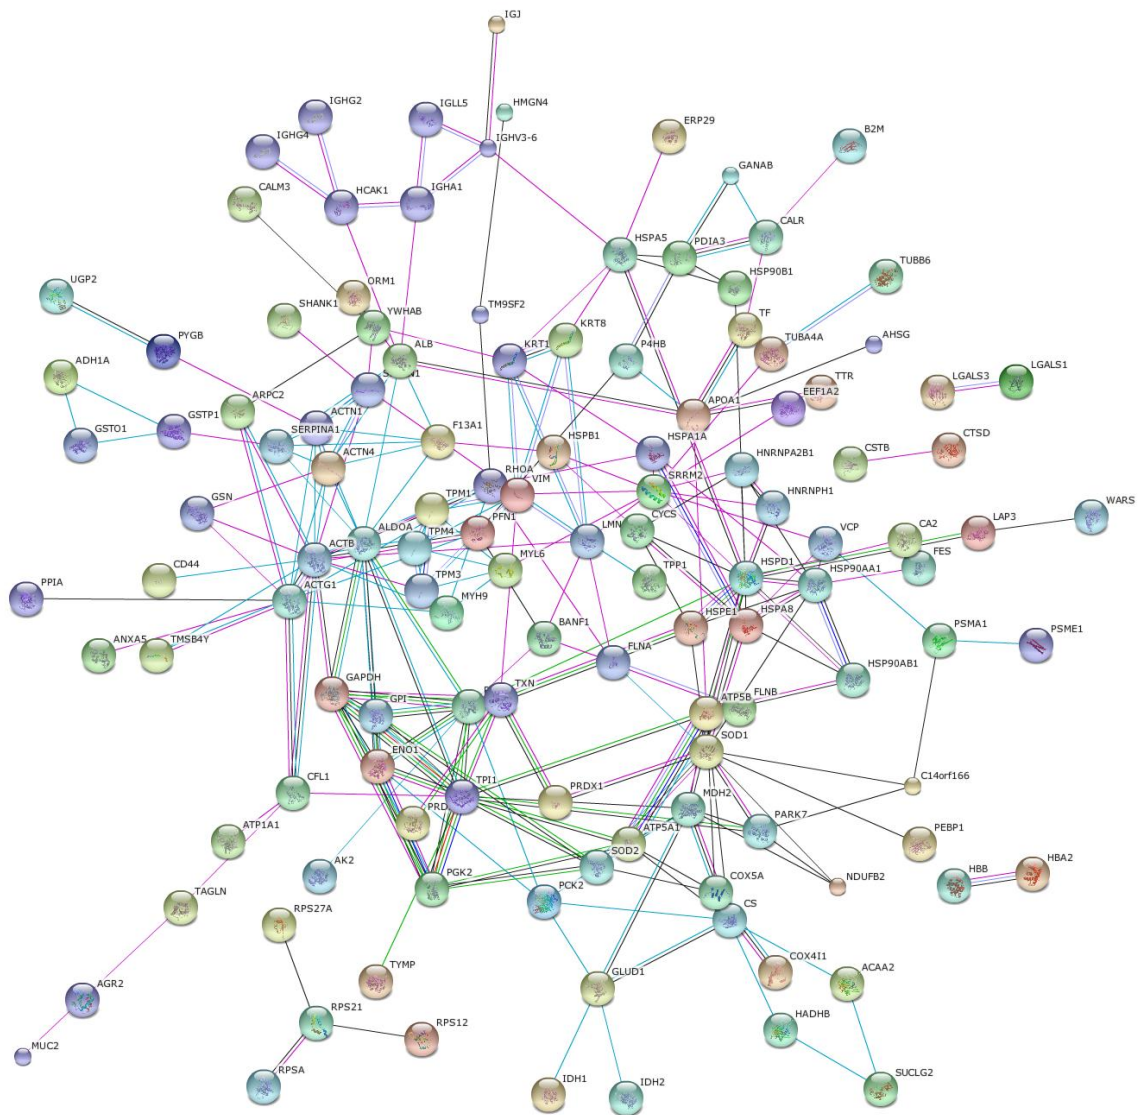

Part B. A protein interaction network was generated from the list of identified proteins in section 9 above. The network was generated in STRINGS version 9.0 (accession date 27.02.13). Orphan nodes are excluded from the representation. The above version excludes information from text mining.



| Adenoma, mid sigmoid, high butyrate vs Normal, mid sigmoid, high butyrate |                                                                     |                   |            |                      |         |          |
|---------------------------------------------------------------------------|---------------------------------------------------------------------|-------------------|------------|----------------------|---------|----------|
| Accession nu                                                              | Protein                                                             | # unique peptides | % coverage | # peptides for quant | 115:113 | p-value  |
| Q8WUW7                                                                    | Pyruvate kinase                                                     | 4                 | 14         | 6                    | 3.01471 | 0.00885  |
| B4DP56                                                                    | cDNA FLJ52237, highly similar to Creatine kinase B-type             | 4                 | 12         | 8                    | 1.41203 | 0.048608 |
| P35579                                                                    | Myosin-9                                                            | 6                 | 4          | 6                    | 1.41013 | 0.019363 |
| C9JEY0                                                                    | Putative uncharacterized protein HADHB                              | 2                 | 12         | 3                    | 1.32458 | 0.012525 |
| P00918                                                                    | Carbonic anhydrase 2                                                | 3                 | 13         | 4                    | 1.28892 | 0.021014 |
| P69905                                                                    | Hemoglobin subunit alpha                                            | 4                 | 30         | 30                   | 1.20429 | 0.021509 |
| P68871                                                                    | LVV-hemorphin-7                                                     | 8                 | 59         | 80                   | 1.10931 | 0.017686 |
| P06733                                                                    | Alpha-enolase                                                       | 8                 | 16         | 18                   | 0.83609 | 0.020562 |
| Q9UNM1                                                                    | Chaperonin 10-related protein                                       | 4                 | 31         | 21                   | 0.81407 | 0.012273 |
| P62937                                                                    | Peptidyl-prolyl cis-trans isomerase A                               | 7                 | 38         | 11                   | 0.75710 | 0.006668 |
| B7Z2X4                                                                    | cDNA FLJ53327, highly similar to Gelsolin                           | 4                 | 5          | 5                    | 0.69201 | 0.030893 |
| P09493                                                                    | Tropomyosin alpha-1 chain                                           | 6                 | 17         | 2                    | 0.41615 | 0.01481  |
| Adenoma, mid sigmoid, low butyrate vs Normal, mid sigmoid, low butyrate   |                                                                     |                   |            |                      |         |          |
| Accession nu                                                              | Protein                                                             | # unique peptides | % coverage | # peptides for quant | 115:113 | p-value  |
| C9JEY0                                                                    | Putative uncharacterized protein HADHB                              | 2                 | 12         | 3                    | 1.89611 | 0.007802 |
| Q14400                                                                    | GLUD1 protein                                                       | 2                 | 11         | 2                    | 1.84097 | 0.013709 |
| A8MW49                                                                    | Putative uncharacterized protein FABP1                              | 4                 | 28         | 5                    | 1.71105 | 0.006486 |
| P08727                                                                    | Keratin, type I cytoskeletal 19                                     | 8                 | 20         | 17                   | 1.30970 | 0.019336 |
| O60744                                                                    | Thioredoxin delta 3                                                 | 3                 | 37         | 9                    | 1.28267 | 0.009616 |
| P00918                                                                    | Carbonic anhydrase 2                                                | 3                 | 13         | 4                    | 1.27860 | 0.024788 |
| P30044                                                                    | Peroxiredoxin-5, mitochondrial                                      | 2                 | 10         | 11                   | 1.27458 | 0.019269 |
| Q9UNM1                                                                    | Chaperonin 10-related protein                                       | 4                 | 31         | 21                   | 1.26111 | 0.00752  |
| P60174                                                                    | Triosephosphate isomerase                                           | 4                 | 19         | 13                   | 1.23517 | 0.036699 |
| B3KQT9                                                                    | cDNA PSEC0175 fis, highly similar to Protein disulfide-isomerase A3 | 5                 | 10         | 6                    | 1.19445 | 0.044497 |
| P56470                                                                    | Galectin-4                                                          | 6                 | 16         | 18                   | 1.18915 | 0.033808 |
| P68871                                                                    | LVV-hemorphin-7                                                     | 8                 | 59         | 80                   | 0.85104 | 0.002871 |
| P02768                                                                    | Serum albumin                                                       | 28                | 37         | 121                  | 0.74812 | 4.11E-08 |
| P00738                                                                    | Haptoglobin beta chain                                              | 5                 | 10         | 5                    | 0.54273 | 0.037146 |
| Q53GC9                                                                    | Transgelin variant                                                  | 4                 | 21         | 6                    | 0.54153 | 0.02818  |

## Comparisons of the effect adenomagenesis, controlling for butyrate level.

Numbers of peptides used in each identification and for protein quantification are shown.

Ratio between reporter ions (a proxy measure of fold-change) is shown in column 6. Proteins identified as altered with a p-value <0.05 are shown in this table. Protein differences were identified in subjects with both high and low butyrate levels in stool.

## Low butyrate

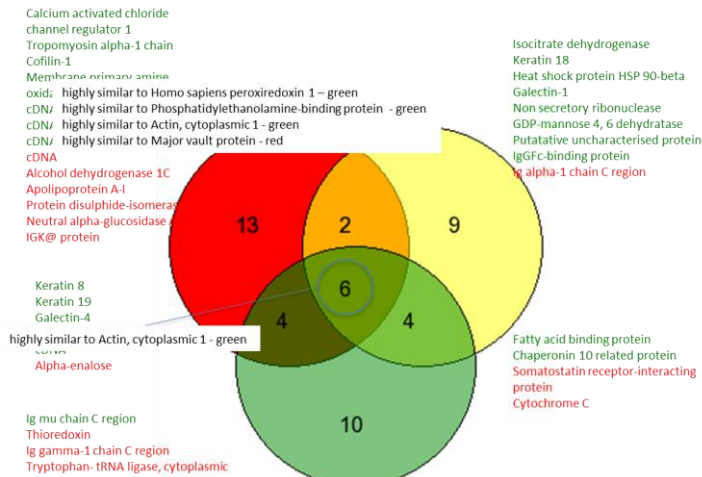

LCO

Carbonic anhydrase 2  
Glyceraldehyde-3-phosphate dehydrogenase  
Cathepsin D  
Cytochrome c oxidase subunit 4 isoform 1, mitochondrial  
Myosin-9  
Treosephosphate isomerase  
Hemoglobin subunit alpha  
Protein DJ-1  
Lamin  
Peroxiredoxin-5 mitochondria

## High butyrate

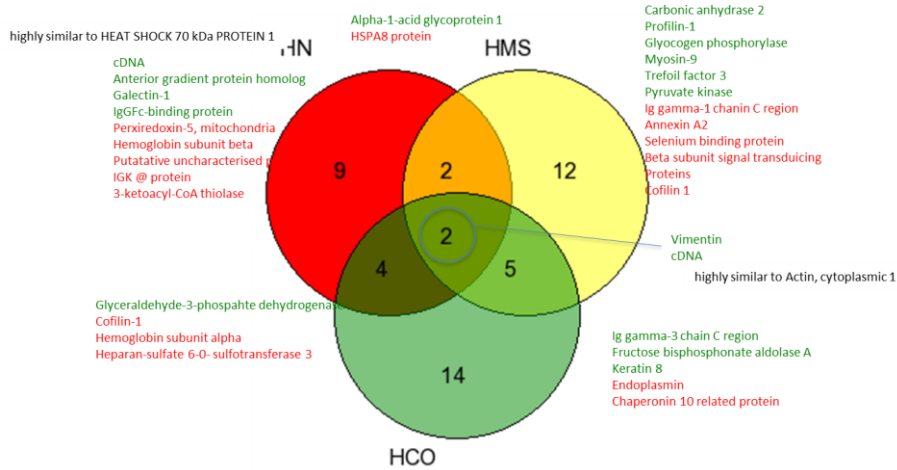

HCO

Calcium-activated chloride channel regulator 1  
Apolipoprotein A-I  
Serum albumin  
Keratin 19  
Amelogenin  
Malate dehydrogenase  
cDNA  
cDNA  
cDNA  
cDNA  
Cytochrome C  
Tryptase alpha/beta 1  
Carbonic anhydrase 2  
Neutral alpha-glucosidase AB

highly similar to Creatine kinase B-type - green  
Full-length cDNA clone CS0DI041YE05 of Placenta of Homo sapiens (human) - green  
highly similar to Serotransferrin - green  
highly similar to Major vault protein - red

| <b>Normal, mid sigmoid, low butyrate vs Normal, mid sigmoid, high butyrate</b>       |                                                                                             |                         |                   |                             |                |                |
|--------------------------------------------------------------------------------------|---------------------------------------------------------------------------------------------|-------------------------|-------------------|-----------------------------|----------------|----------------|
| <i>Accession num</i>                                                                 | <i>Protein</i>                                                                              | <i># unique peptide</i> | <i>% coverage</i> | <i># peptides for quant</i> | <i>115:113</i> | <i>p-value</i> |
| P09493                                                                               | Tropomyosin alpha-1 chain                                                                   | 6                       | 17                | 2                           | 1.8            | 0.014757       |
| A8K714                                                                               | Calcium-activated chloride channel regulator 1                                              | 8                       | 9                 | 14                          | 1.7            | 0.001841       |
| O43707                                                                               | Alpha-actinin-4                                                                             | 7                       | 8                 | 5                           | 1.4            | 0.017473       |
| P04080                                                                               | Cystatin-B                                                                                  | 3                       | 34                | 8                           | 1.3            | 0.021841       |
| P68871                                                                               | LVV-hemorphin-7                                                                             | 8                       | 59                | 80                          | 1.2            | 1.47E-05       |
| B4E335                                                                               | cDNA FLJ52842, highly similar to Actin, cytoplasmic 1                                       | 12                      | 36                | 44                          | 1.2            | 0.007378       |
| P02768                                                                               | Serum albumin                                                                               | 28                      | 37                | 121                         | 1.2            | 0.00022        |
| Q9UNM1                                                                               | Chaperonin 10-related protein                                                               | 4                       | 31                | 21                          | 0.8            | 0.024277       |
| P04406                                                                               | Glyceraldehyde-3-phosphate dehydrogenase                                                    | 8                       | 24                | 13                          | 0.8            | 0.042782       |
| P62937                                                                               | Peptidyl-prolyl cis-trans isomerase A                                                       | 7                       | 38                | 11                          | 0.7            | 0.019938       |
| P68104                                                                               | Elongation factor 1-alpha 1                                                                 | 6                       | 15                | 9                           | 0.7            | 0.03489        |
| A8MW49                                                                               | Putative uncharacterized protein FABP1                                                      | 4                       | 28                | 5                           | 0.6            | 0.002161       |
| B4DW73                                                                               | cDNA FLJ50710, highly similar to Phosphoenolpyruvate carboxykinase                          | 3                       | 5                 | 3                           | 0.6            | 0.003643       |
| P11021                                                                               | 78 kDa glucose-regulated protein (GRP-78)                                                   | 3                       | 5                 | 4                           | 0.5            | 0.043503       |
| Q14400                                                                               | GLUD1 protein                                                                               | 2                       | 11                | 2                           | 0.3            | 0.020021       |
| <b>Adenoma, contralateral, low butyrate vs Adenoma, contralateral, high butyrate</b> |                                                                                             |                         |                   |                             |                |                |
| <i>Accession num</i>                                                                 | <i>Protein</i>                                                                              | <i># unique peptide</i> | <i>% coverage</i> | <i># peptides for quant</i> | <i>115:113</i> | <i>p-value</i> |
| Q53GC9                                                                               | Transgelin variant                                                                          | 4                       | 21                | 6                           | 2.0            | 0.008861       |
| B3KSV9                                                                               | cDNA FLJ37148 fis, highly similar to Homo sapiens Na <sup>+</sup> /H <sup>+</sup> exchanger | 2                       | 7                 | 2                           | 1.5            | 0.040968       |
| P07339                                                                               | Cathepsin D heavy chain                                                                     | 2                       | 5                 | 5                           | 1.4            | 0.026791       |
| P60174                                                                               | Triosephosphate isomerase                                                                   | 4                       | 19                | 13                          | 1.4            | 0.006505       |
| P01876                                                                               | Ig alpha-1 chain C region                                                                   | 6                       | 17                | 22                          | 1.3            | 0.003091       |
| P68871                                                                               | LVV-hemorphin-7                                                                             | 8                       | 59                | 80                          | 1.2            | 3.37E-05       |
| Q9UNM1                                                                               | Chaperonin 10-related protein                                                               | 4                       | 31                | 21                          | 1.1            | 0.034147       |
| P02768                                                                               | Serum albumin                                                                               | 28                      | 37                | 121                         | 0.8            | 0.000383       |
| B3KPS3                                                                               | cDNA FLJ32131 fis, clone PEBLM2000267, highly similar to Tubulin                            | 4                       | 13                | 13                          | 0.8            | 0.031776       |
| P05787                                                                               | Keratin, type II cytoskeletal 8                                                             | 13                      | 25                | 25                          | 0.8            | 0.018792       |
| P02647                                                                               | Apolipoprotein A-I(1-242)                                                                   | 7                       | 26                | 17                          | 0.7            | 0.012613       |
| P08727                                                                               | Keratin, type I cytoskeletal 19                                                             | 8                       | 20                | 17                          | 0.7            | 0.035073       |
| P68104                                                                               | Elongation factor 1-alpha 1                                                                 | 6                       | 15                | 9                           | 0.7            | 0.023343       |
| Q13747                                                                               | Alpha-1 antitrypsin                                                                         | 3                       | 15                | 4                           | 0.7            | 0.023864       |
| B0YJC4                                                                               | Vimentin variant 3                                                                          | 8                       | 20                | 20                          | 0.7            | 0.01397        |
| P07900                                                                               | Heat shock protein HSP 90-alpha                                                             | 6                       | 7                 | 6                           | 0.6            | 0.017197       |
| P09493                                                                               | Tropomyosin alpha-1 chain                                                                   | 6                       | 17                | 2                           | 0.4            | 0.003849       |

**Comparisons of the effect butyrate on the mucosal proteome, controlling for diagnosis and proximity to adenoma.** Numbers of peptides used in each identification and for protein quantification are shown. Ratio between reporter ions (a proxy measure of fold-change) is shown in column 6. Proteins identified as altered with a p-value <0.05 are shown in this table. Protein differences were identified in subjects with both high and low butyrate levels in stool.

### Normal

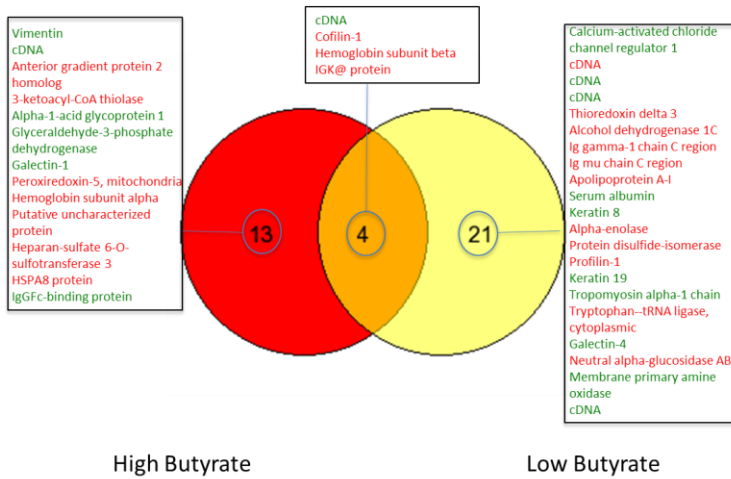

### Adenoma MS

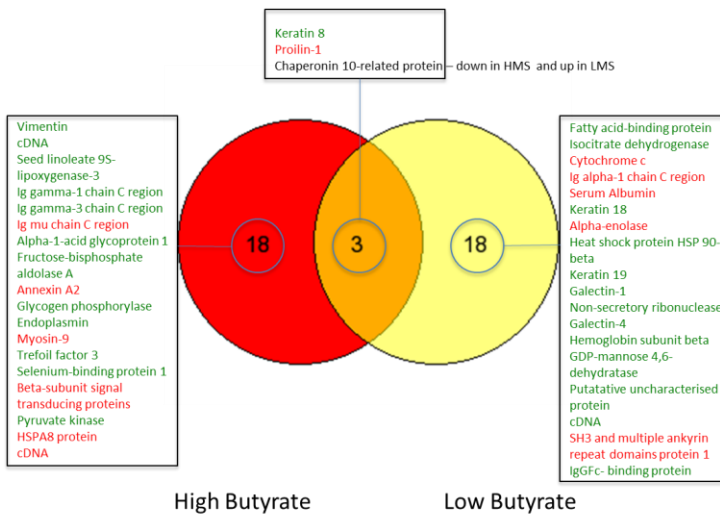

### Adenoma-CL

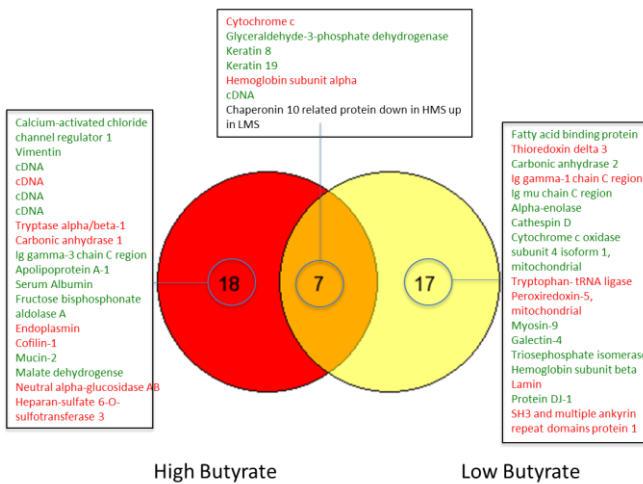

**Supplementary Information 12: Western Immunoblot Orthogonal Validation of Targets altered in response to butyrate**

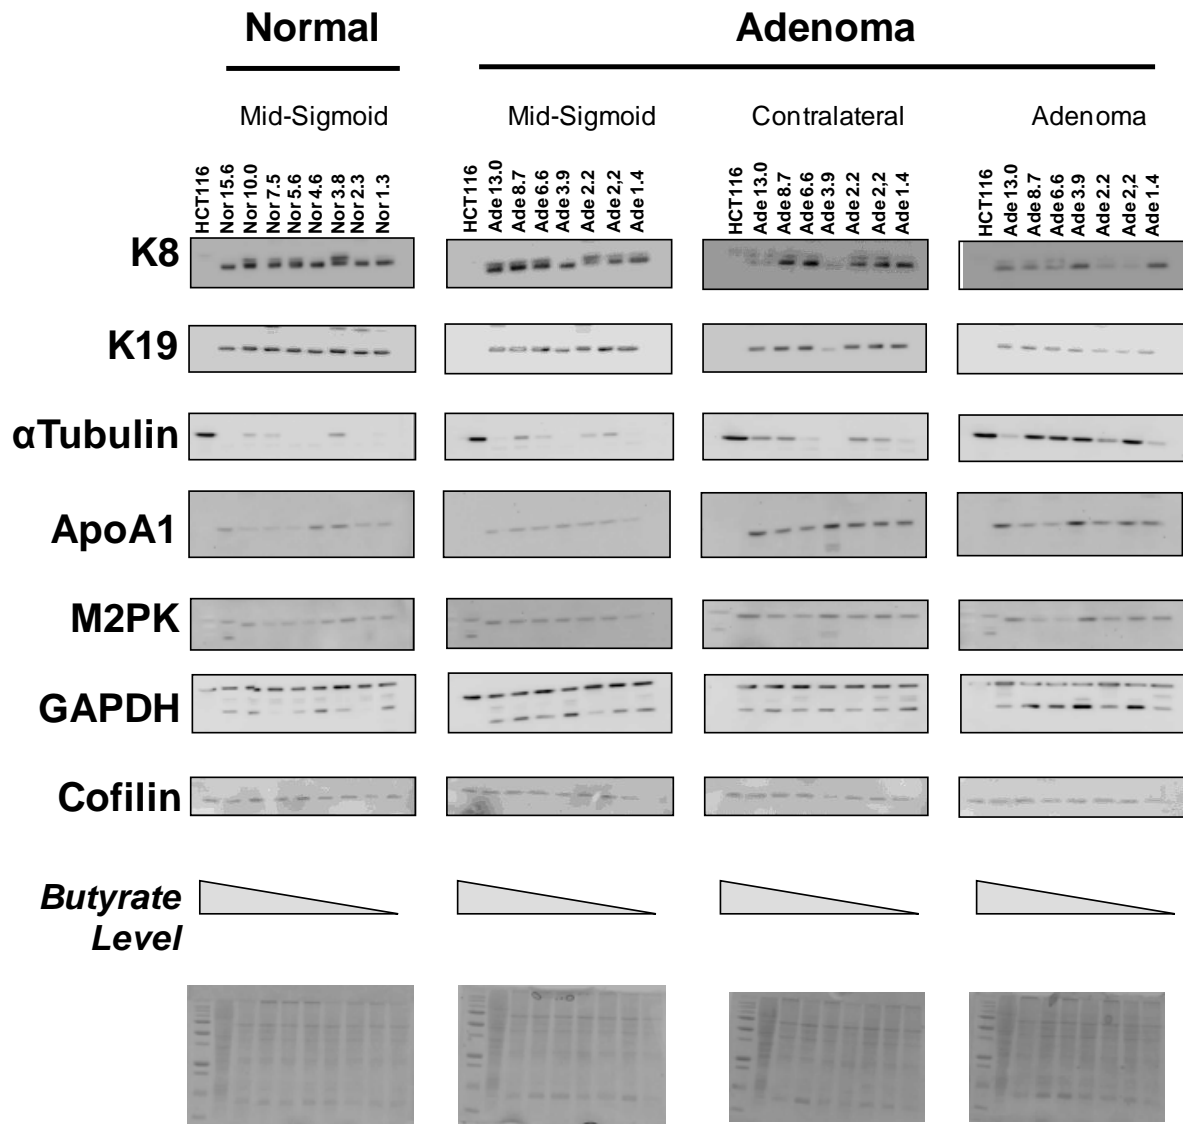

A subset of proteins found to be most altered in the iTRAQ analysis were chosen for validation by immunoblotting as an independent methodology. The rationale for choice included degree of change, axis of change (by butyrate or by disease progression), biological/clinical relevance to colon carcinogenesis and, pragmatically, availability of a commercial antibody. Seven proteins were selected in all: keratin 8, keratin 19,  $\alpha$ -tubulin, ApoA1, M2PK, GAPDH and cofilin. For analysis of the effect of butyrate on expression of these proteins, the full set of samples from the study were grouped primarily by disease status and secondarily by sample position into normal (mid-sigmoid), adenoma (mid-sigmoid sample), adenoma (contralateral sample), adenoma (adenoma sample) and then ranked by butyrate status of the pools (as shown in Fig 1C). Western blots of each ranked group

were immunoprobed with the antibodies indicated. All data are shown in Figure 3. As many proteins' expression are labile in the presence of butyrate, including commonly used gel loading controls such as tubulin, coomassie blue-stained gels have been used to show that the samples contain similar amounts of protein.

Trends can be seen in the samples for a number of proteins, although there are differences between groups. For keratins 8 and 19 there is a decrease in expression associated with decreasing butyrate level that is marked and consistent in the mid-sigmoid samples of the adenoma group, but less pronounced or absent from the normal group. The trend is consistent with both proteins. However the trend is flattened in the adenoma and contralateral samples, implying there may be an over-riding field effect. There is a trend towards increased expression of ApoA1 and M2PK with decreasing butyrate in the samples from normal subjects, which is not matched in samples from any of the adenoma groups. GAPDH and cofilin did not appear to be influenced by butyrate status in any group.

**Supplementary Information 13: Western Immunoblot Orthogonal Validation of Targets altered in response to lesional proximity**

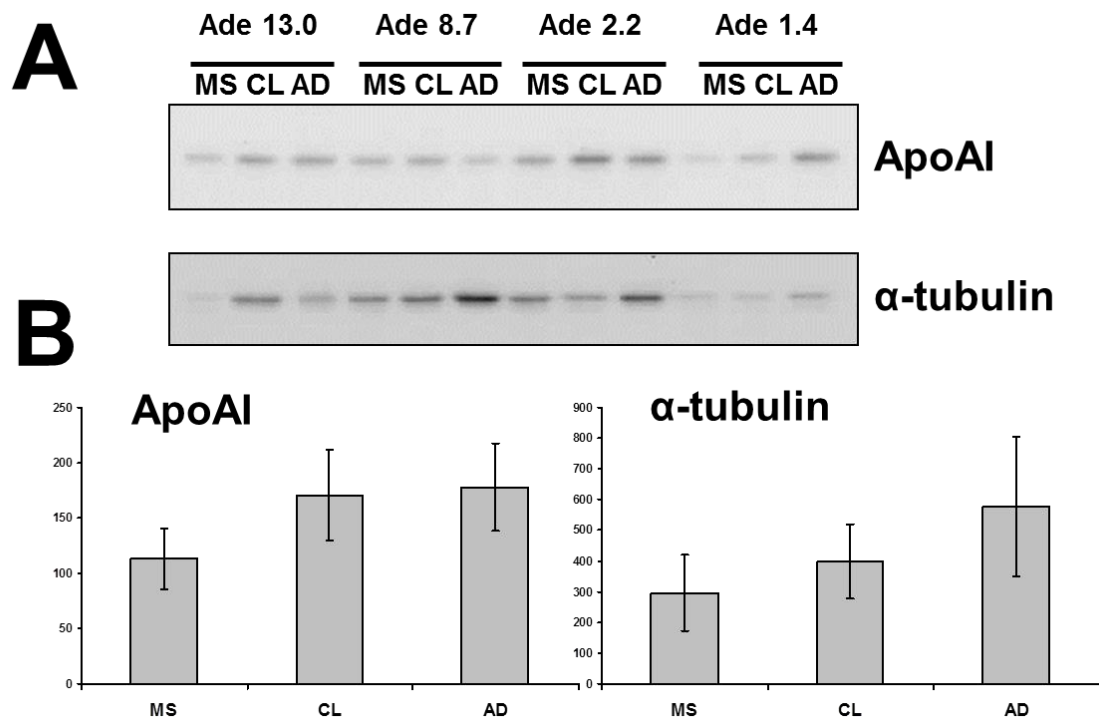

## Supplementary Information 14: Comparison of subgroups in the normal population for keratin endpoints assessed by IHC

Surface intensity P=0.33

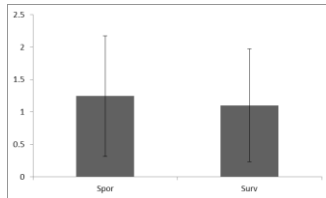

Crypt intensity P=0.47

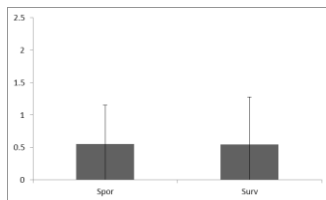

Crypt Depth P=0.28

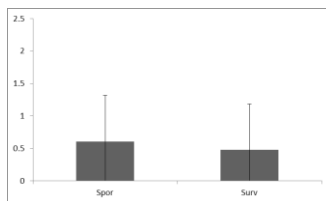

Subjects in the Normal group were recruited from both adenoma surveillance clinics and new cases, and therefore represent a mix of individuals for which a sub-population may continue to exhibit the changes in keratin expression observed associated with the presence of adenoma. Retrospective data from subjects where available as to previous history allowed the division into sporadic (Spor, n=9) and surveillance (Surv, n=9) subgroups. The mid-sigmoid K8 scores for each group were compared (above panels). There were no significant differences or trends between these groups.



Supplementary Information 15: 2DGE Analysis of acetylome

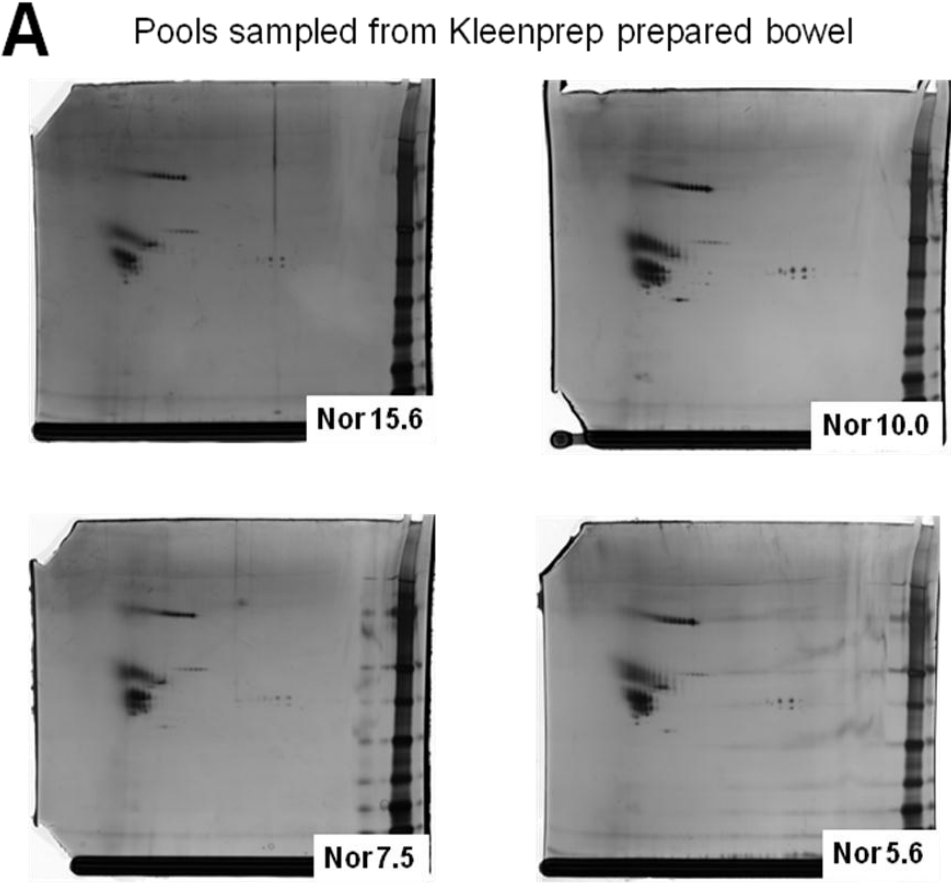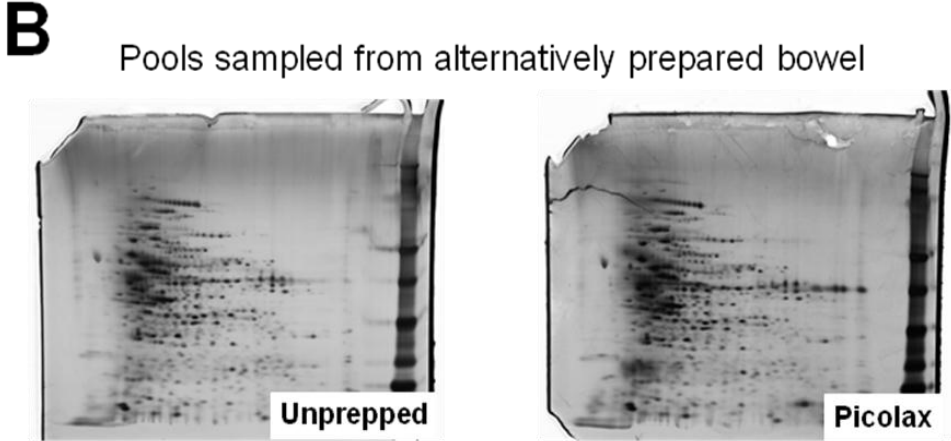

FACT OBS Proteomics Paper

Panel A shows 2d gel images from four pools from subjects with normal bowel pathology and mean faecal butyrate of 15.5, 10.0, 7.5 and 5.6 mM respectively. The numbers of protein spots are extremely

low by comparison with sample from Pico-lax-prepared bowel and from unprepared bowel (Panel B), which are broadly similar in distribution and intensity.

Following fractionation of samples, the IP eluate, enriched for acetyl proteins, was analysed by 2DGE. One eluate (representing a pool of 4 subjects with similar faecal butyrate) was run on each 2d gel. Pools included the higher and lower butyrate range from normal, and from the multiple positions of subjects with adenoma. Two additional samples were included as a result of the scope of the study– a pool from biopsies extracted after Picolax, and a pool from biopsies taken intraoperatively during cancer resection (which was undertaken without bowel prep). The numbers of protein spots appearing on the gels from subjects prepared with Kleanprep, irrespective of faecal butyrate concentration, was extremely low (Panel A). In order to distinguish between a technical failure and genuine alteration protein acetylation, samples from unprepared and Picolax-prepared bowel were compared (Panel B). Both showed a spot distribution comparable or slightly enriched from that achieved in method work-up using cell line material (LJC & BMC unpublished). As the majority of samples acquired for this study (and indeed in general GI clinics, are derived from PEG-based bowel prep) this analytical arm was suspended.
